# Supplementary material for: N-Iodosuccinimide involved one-pot metal-free synthesis of 2-heteroaromatic benzothiazole compounds
Source: Royal Society of Chemistry journal article supplement (doi:10.1039/c6ob02731h), 2017-01-01

Electronic Supplementary Information

***N*-iodosuccinimide involved One-Pot Metal-free Synthesis of 2-Heteroaromatic Benzothiazole Compounds**

Xianglong Chu<sup>a</sup>, Tiantian Duan<sup>a</sup>, Xuan Liu<sup>a</sup>, Lei Feng<sup>a</sup>, Jiong Jia<sup>a</sup>, and Chen Ma<sup>\*a,b</sup>

<sup>a</sup> school of Chemistry and Chemical Engineering, Shandong University, Jinan, 250100, P R China.

<sup>b</sup>State Key Laboratory of Bioactive Substance and Function of Natural Medicines, Institute of Materia Medica, Chinese Academy of Medical Sciences and Peking Union Medical College, Beijing, 100050, P. R. China.

E-mail: chenma@sdu.edu.cn

|                          |                                         |
|--------------------------|-----------------------------------------|
| Table of Contents        | -----                                   |
|                          | -----                                   |
|                          | I. Typical procedure for synthesis of 2 |
|                          | Page 2                                  |
| II. NMR Spectra and HRMS | Page 3                                  |
| III. References          | Page 36                                 |

**Typical procedure for synthesis of 2<sup>1</sup>**

0.06 Moles of the 2-aminobenzothiazole was dissolved in 40 ml of warm 85%  $\text{H}_3\text{PO}_4$ . The resultant homogeneous solution was cooled to  $-8\text{ }^\circ\text{C}$  and a concentrated aqueous solution of 0.036 moles of  $\text{NaNO}_2$  was added slowly below the surface with stirring such that the temperature was not allowed to rise above  $-4\text{ }^\circ\text{C}$ . The resultant thick yellow syrup was added to 15 ml of pre-chilled ( $0\text{ }^\circ\text{C}$ )  $\text{H}_3\text{PO}_2$  (50% Fisher) drop wise with stirring and then allowed to warm to room temperature. After all gas evolution ceased, the solution was diluted with ice-cold water, neutralized with  $\text{Na}_2\text{CO}_3$ , and extracted with chloroform. The chloroform layer was dried ( $\text{Na}_2\text{SO}_4$ ), concentrated on vacuo, and the crude benzothiazole purified either by sublimation or crystallization from water /ethanol

### III. NMR Spectra and HRMS

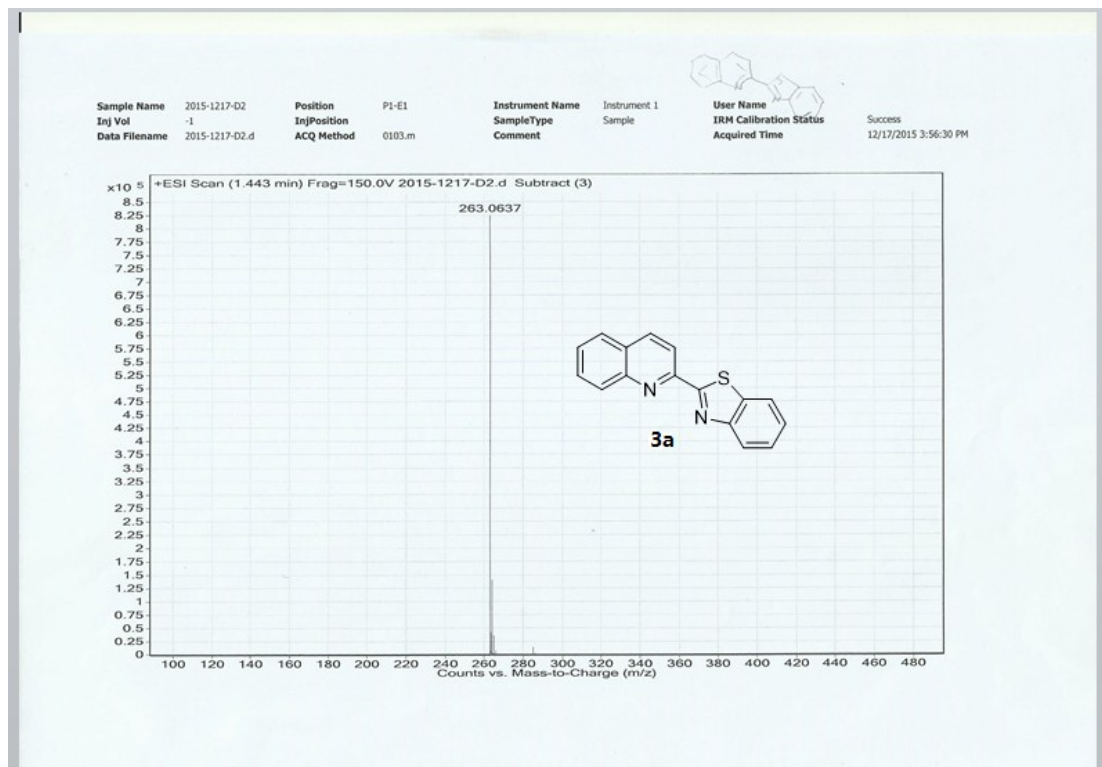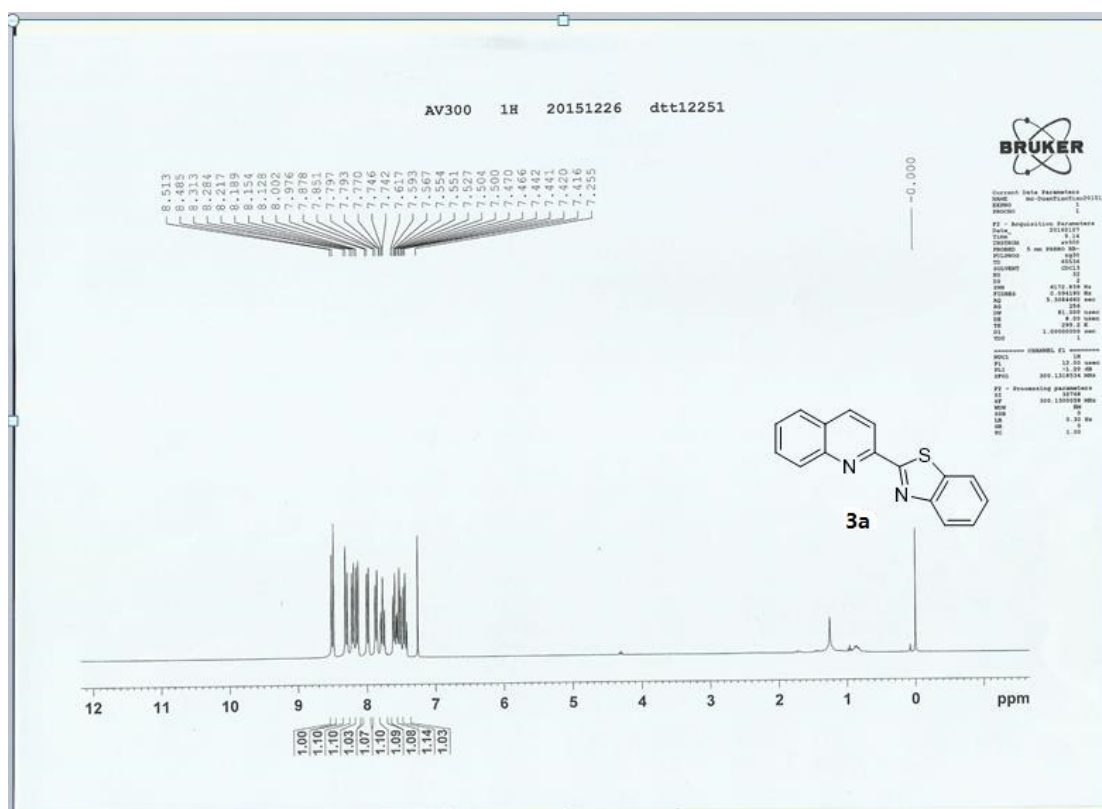



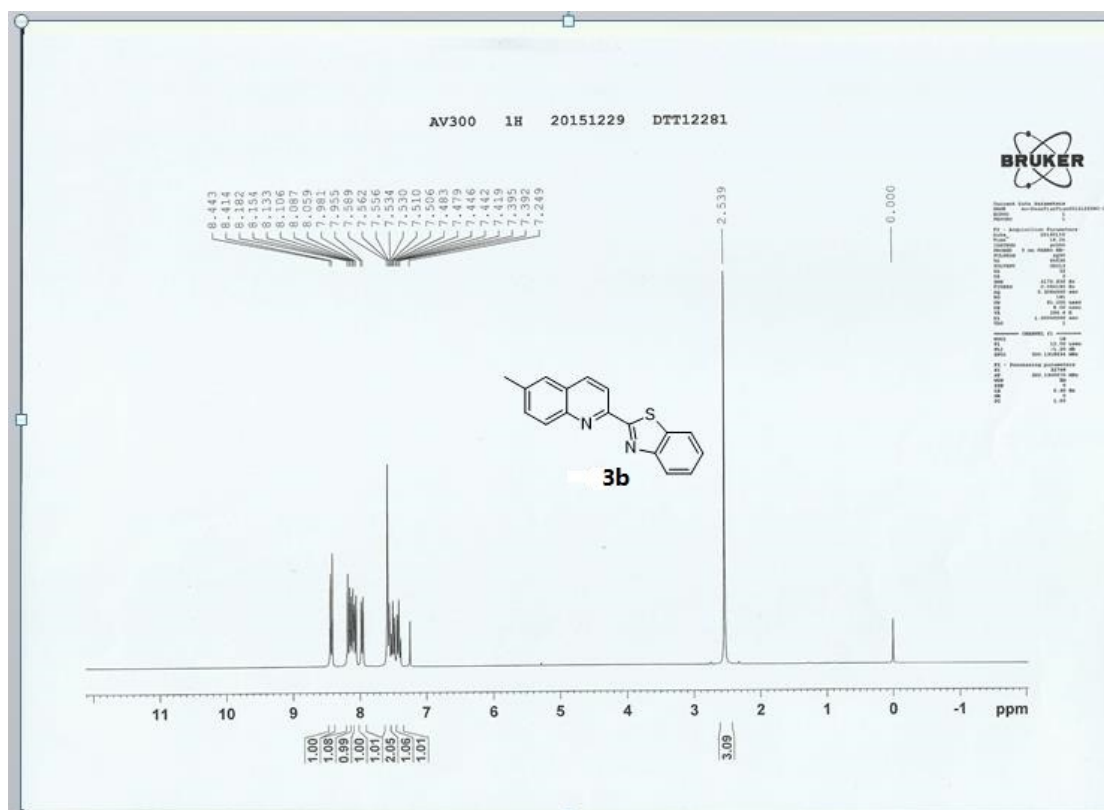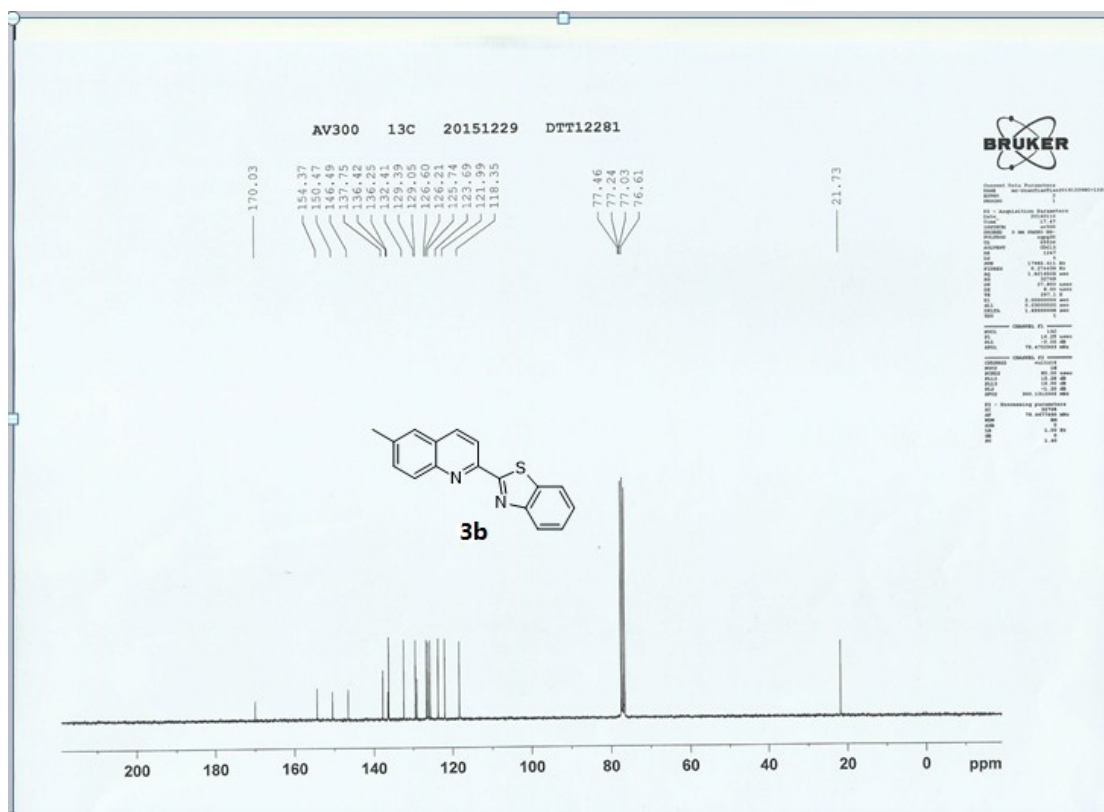

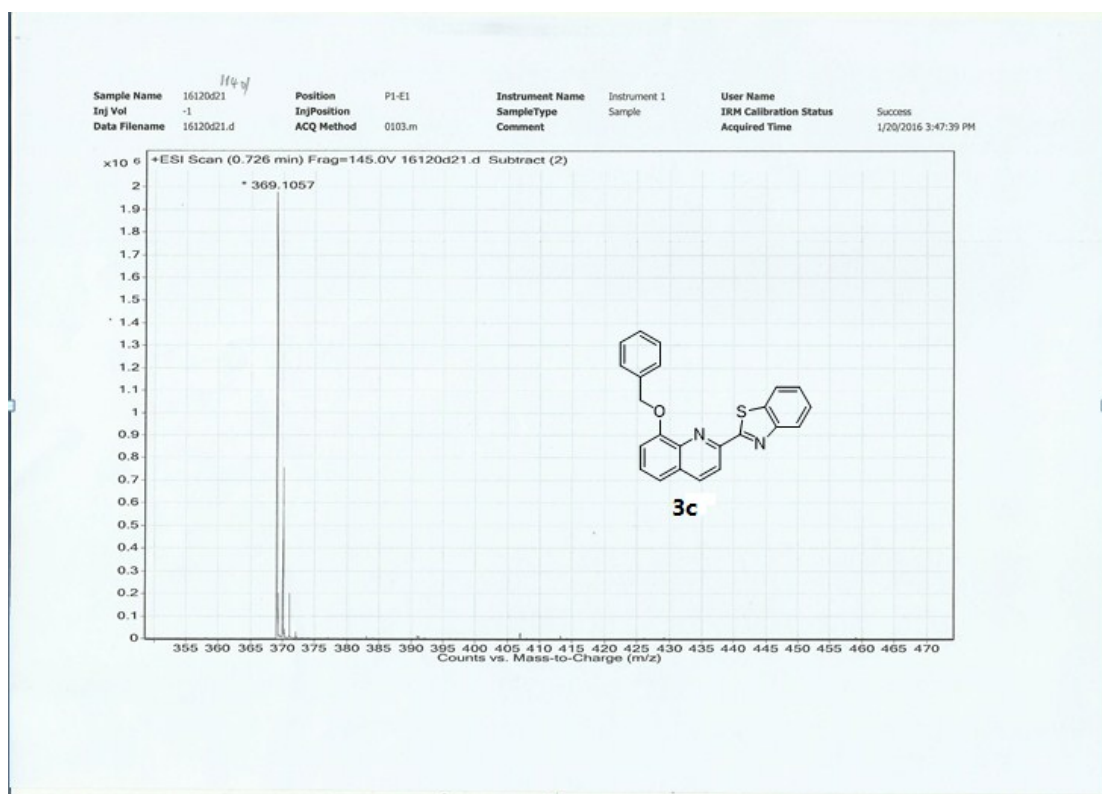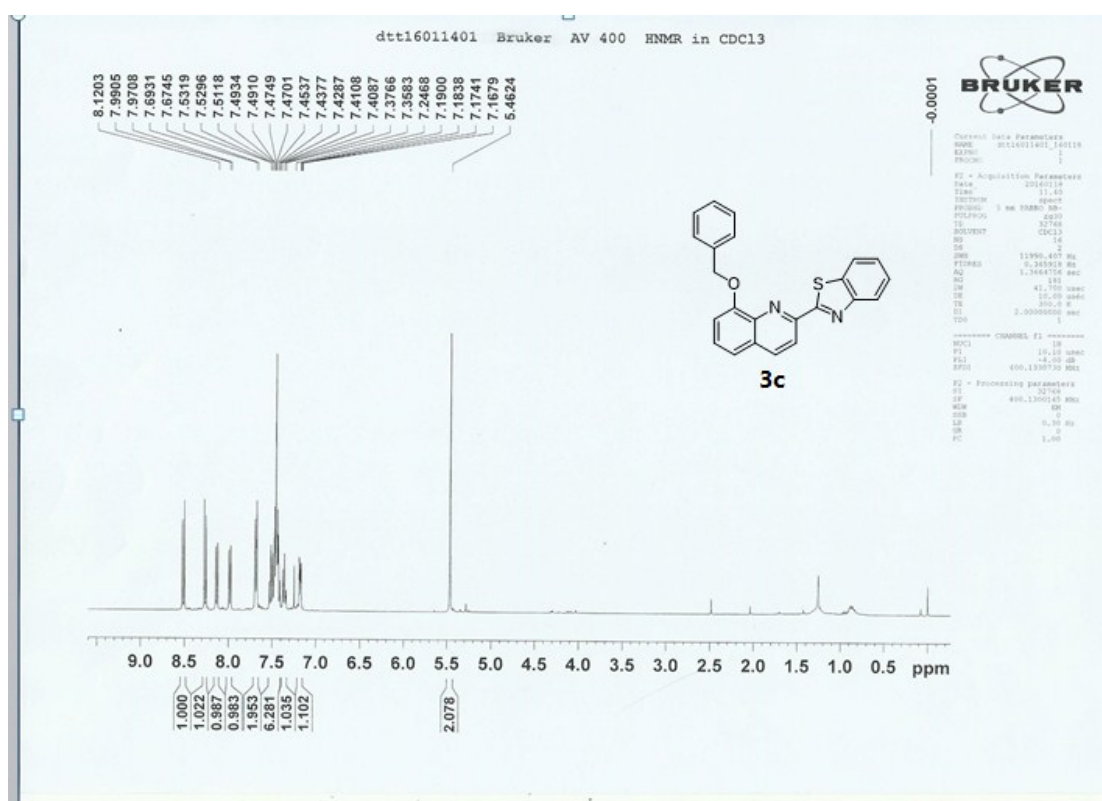

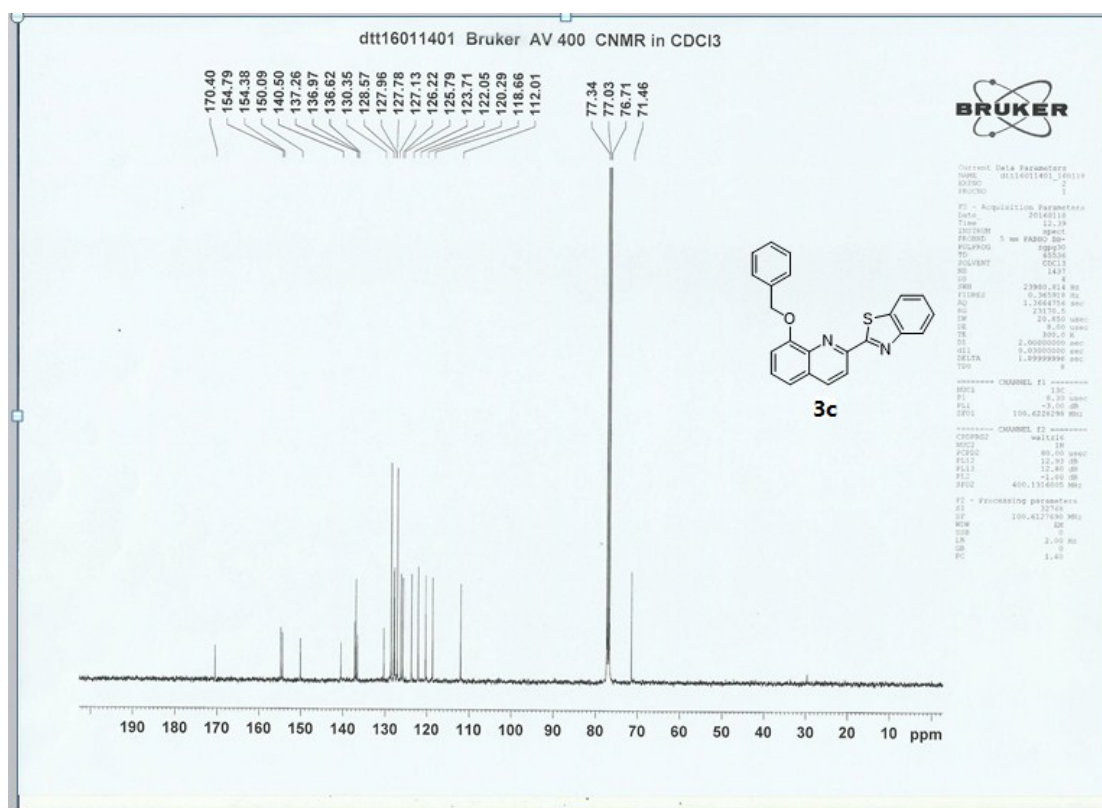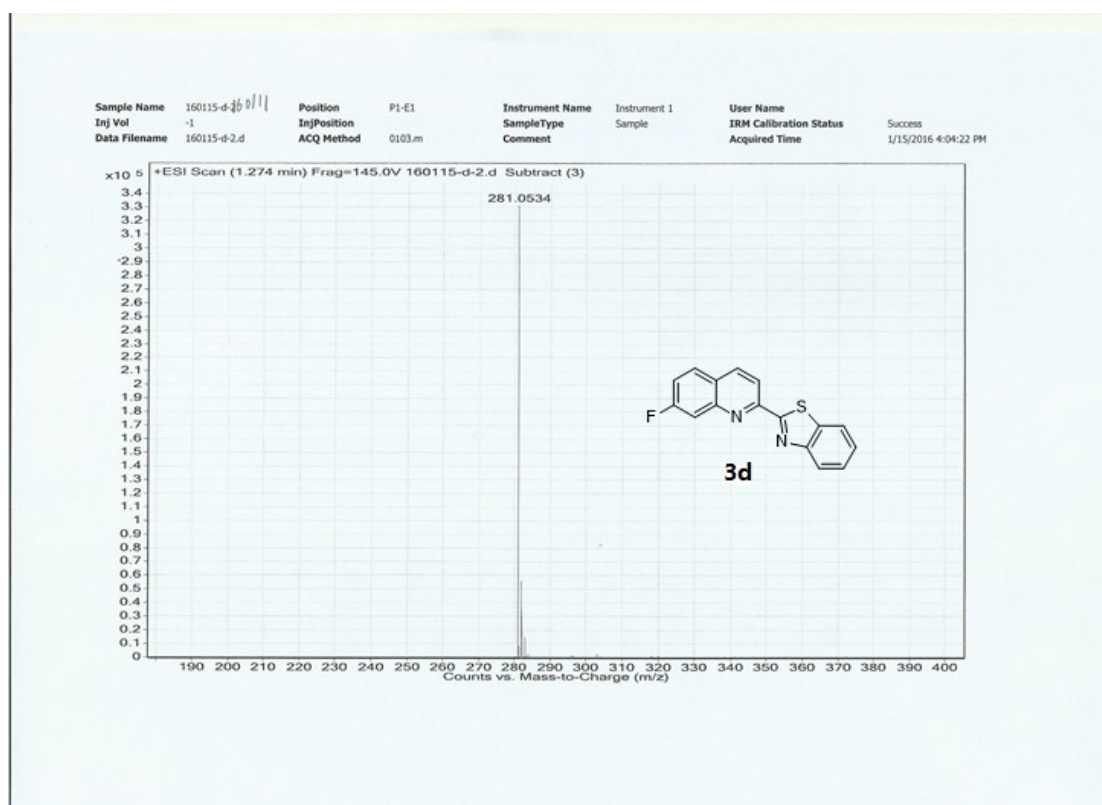







Sample Name 160115-03-22  
 Inj Vol -1  
 Data Filename 160115-d-3.d  
 Position P1-01  
 InjPosition  
 ACQ Method 0103.m  
 Instrument Name Instrument 1  
 SampleType Sample  
 Comment  
 User Name  
 IRM Calibration Status Success  
 Acquired Time 1/15/2016 4:06:54 PM

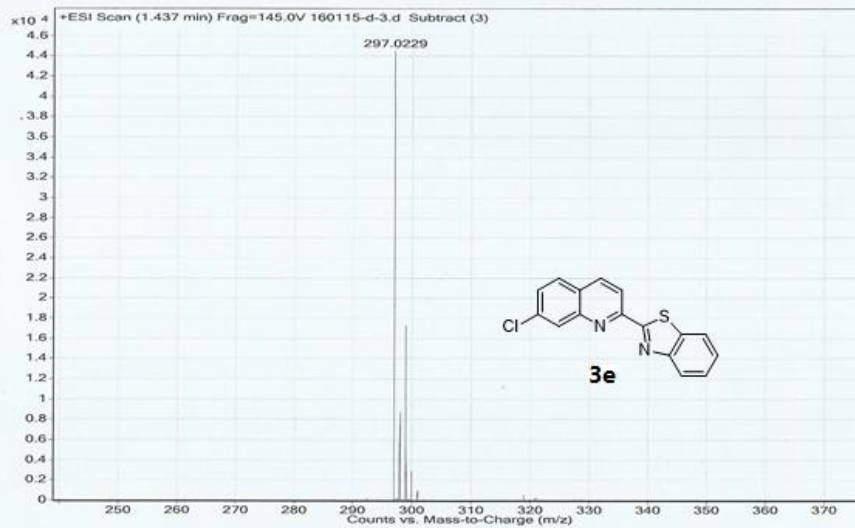

AV300 1H 20151229 DTT12282

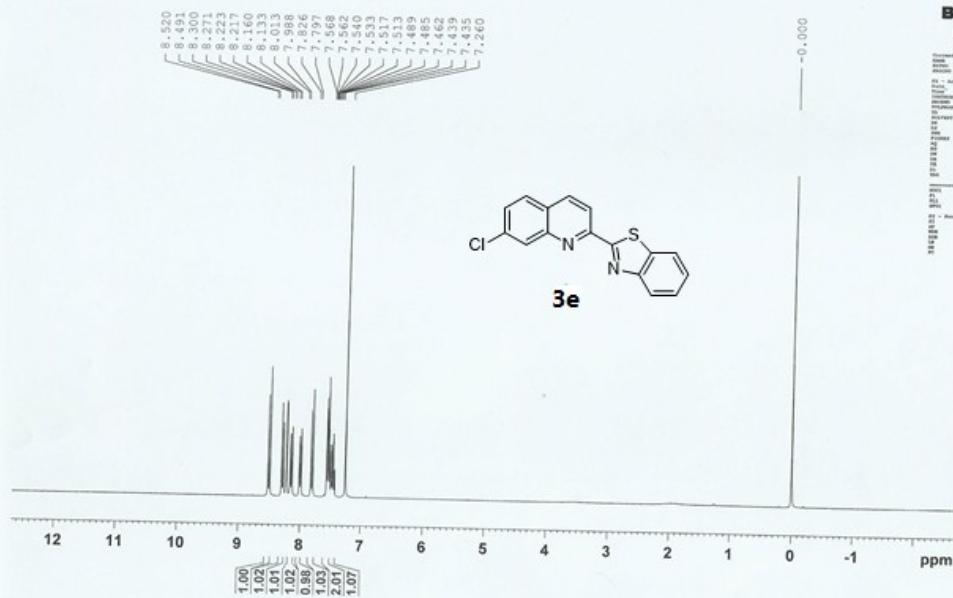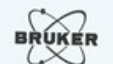

Sample Name: 20151229  
 Date: 12/29/2015  
 Time: 12:28:22  
 Operator: DTT  
 Instrument: AV300  
 P1-01  
 1H NMR  
 CDCl3  
 297.0229  
 7.260  
 0.000  
 1.00  
1.02  
1.01  
1.02  
0.98  
1.03  
2.01  
1.07

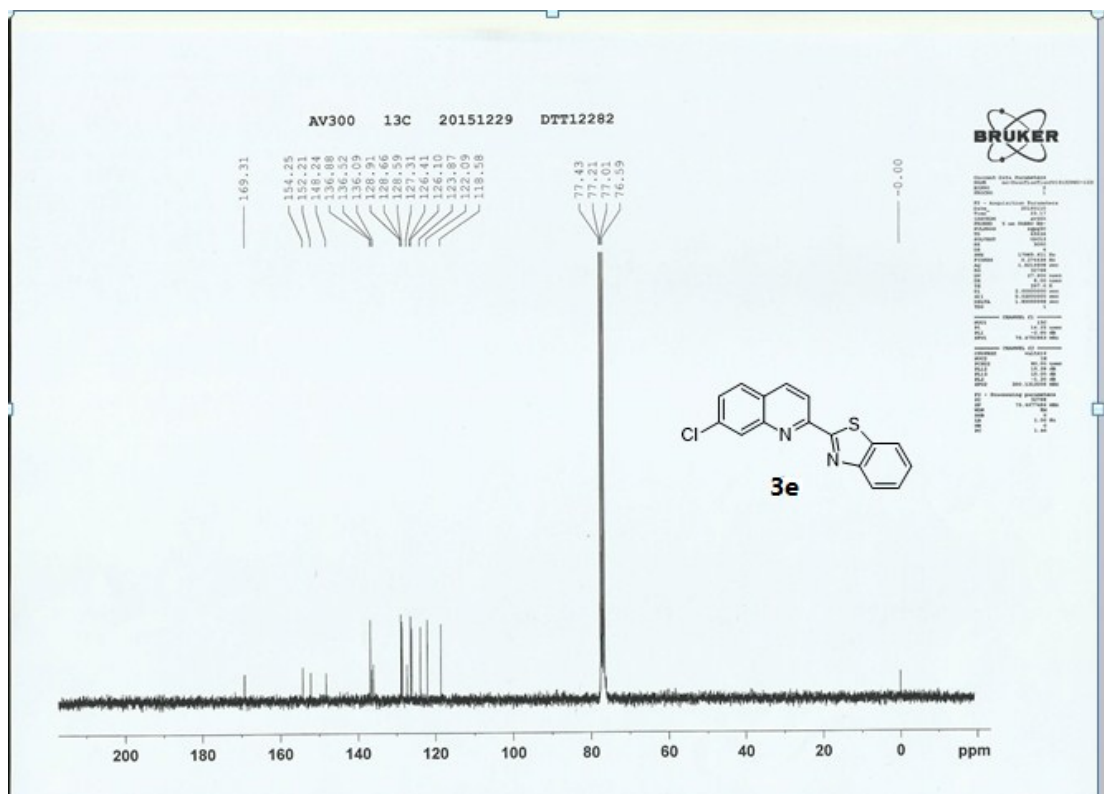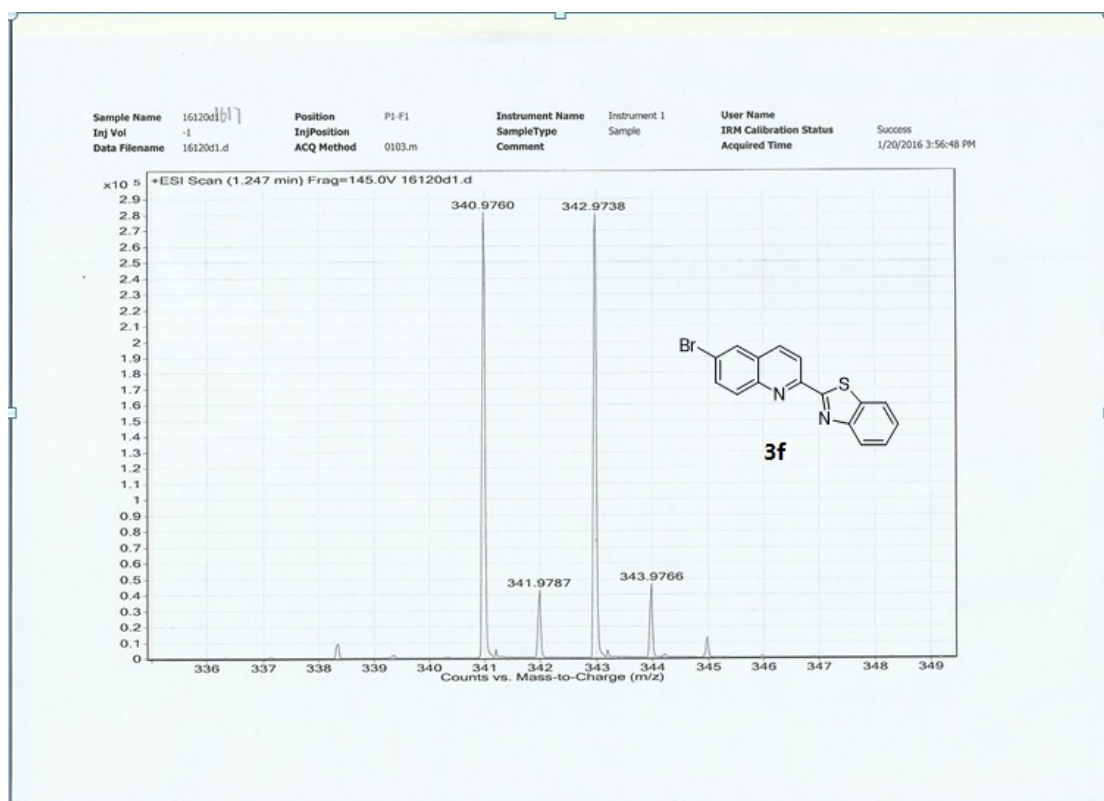

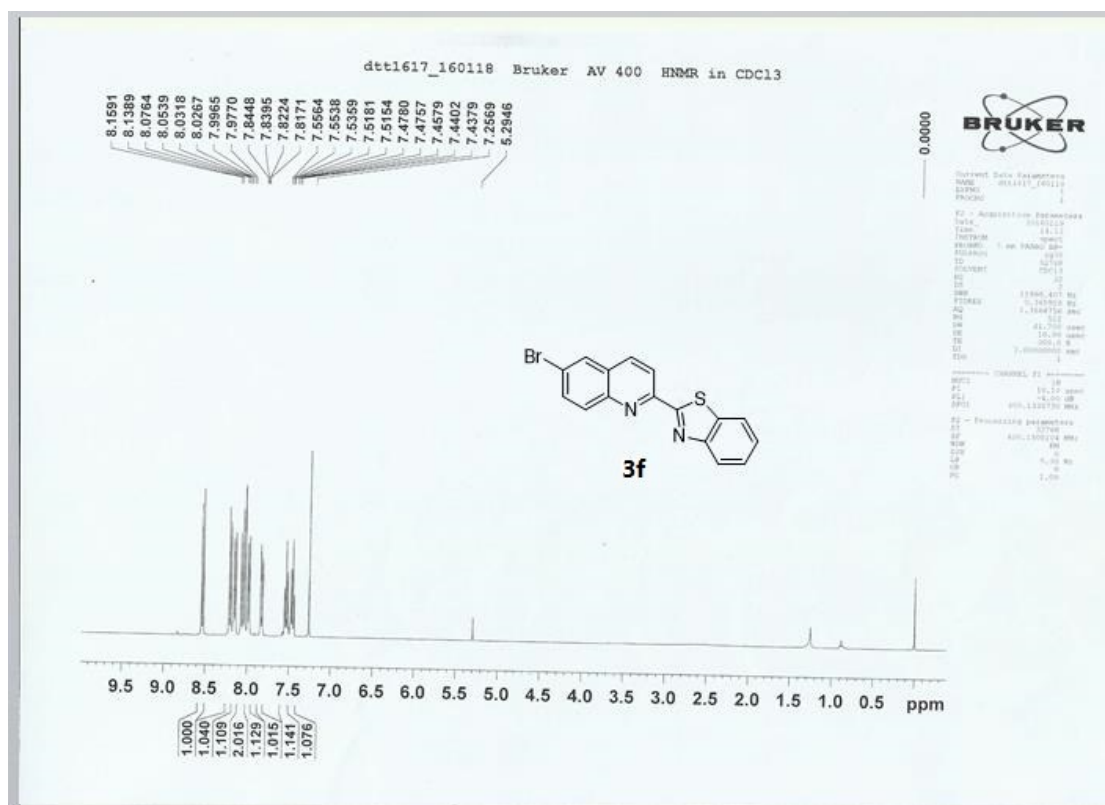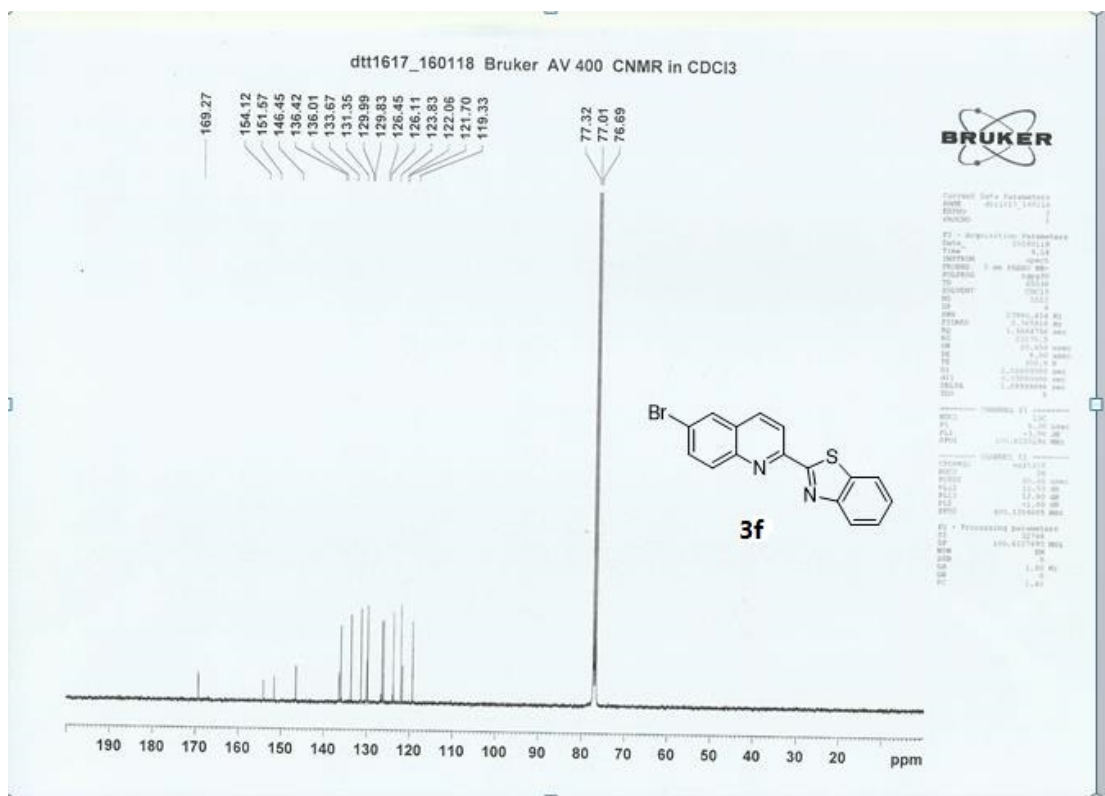

| Sample Name   | 160115-d-1   | Position    | P1-F1  | Instrument Name | Instrument 1 | User Name     | 1RM Calibration Status | Success              |
|---------------|--------------|-------------|--------|-----------------|--------------|---------------|------------------------|----------------------|
| Inj Vol       | -1           | InjPosition |        | SampleType      | Sample       | Acquired Time |                        | 1/15/2016 4:01:49 PM |
| Data Filename | 160115-d-1.d | ACQ Method  | 0103.m | Comment         |              |               |                        |                      |

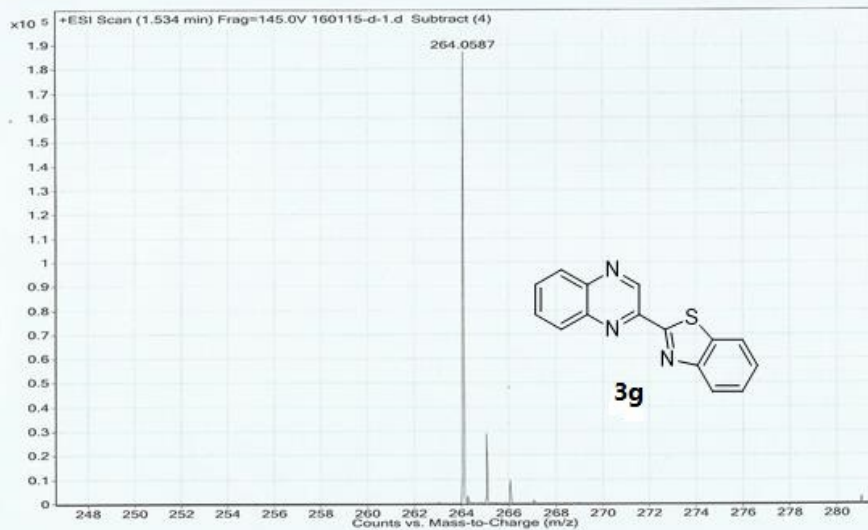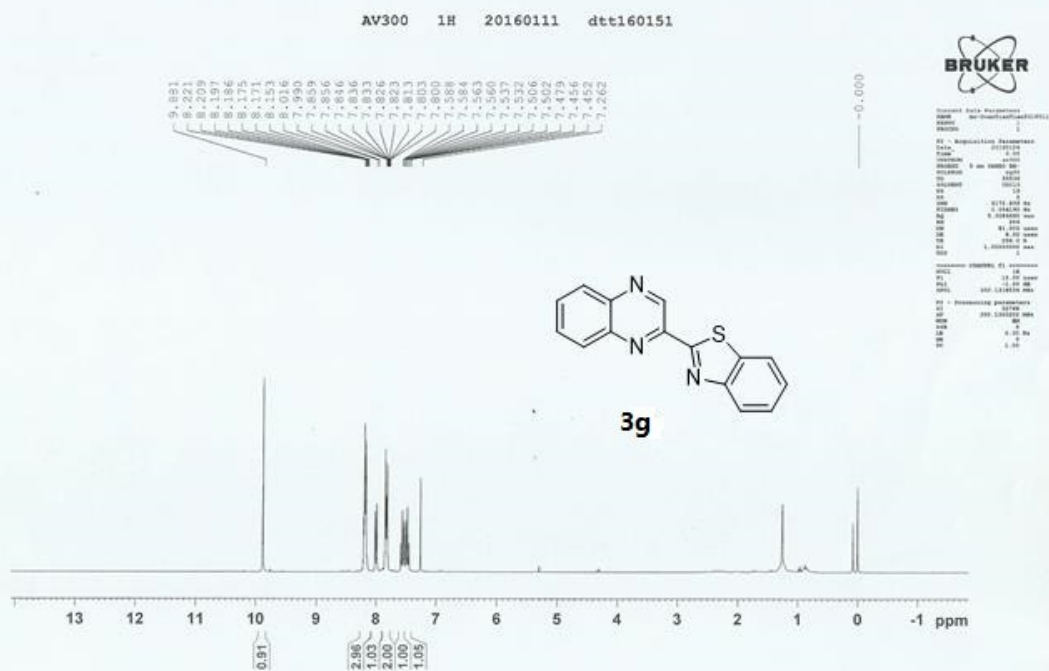





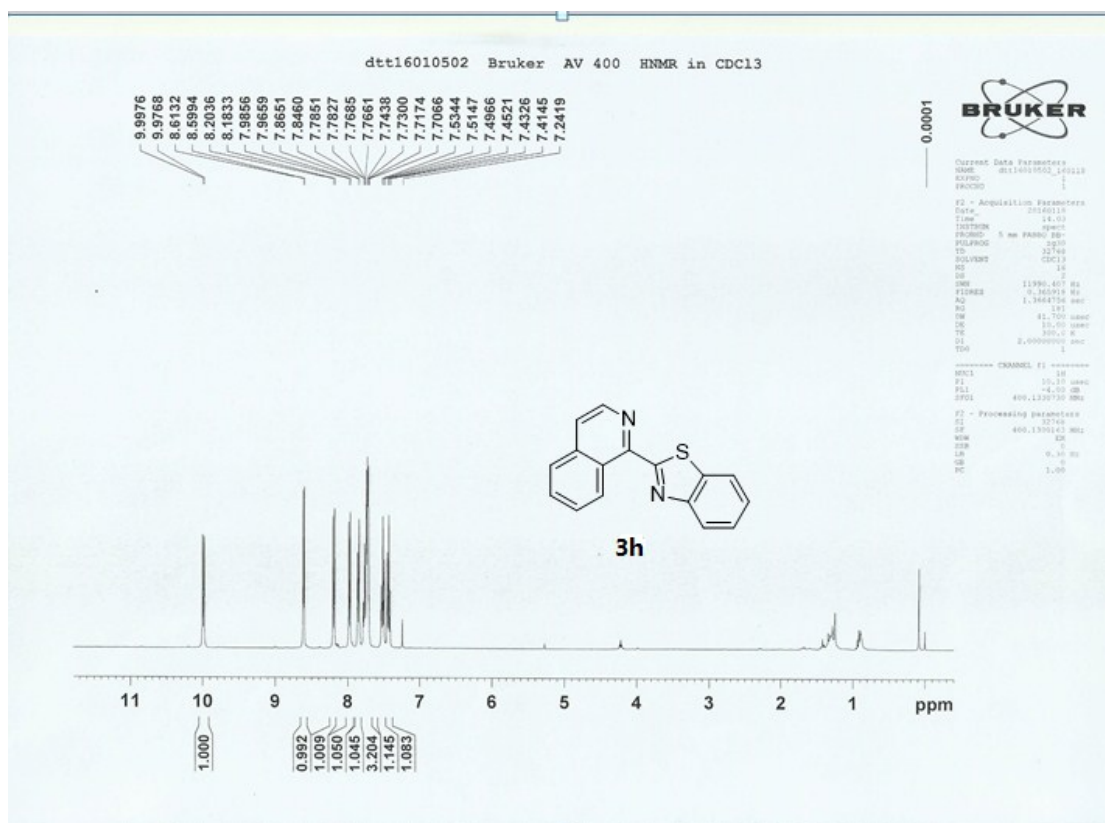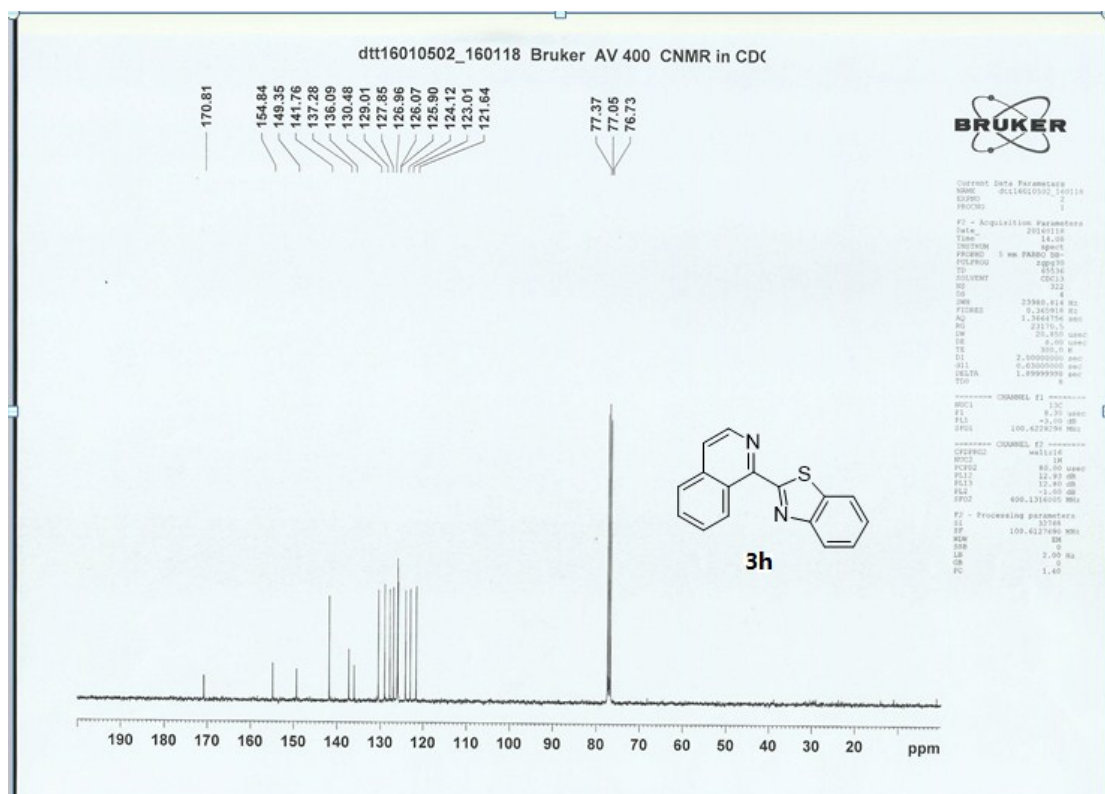



Sample Name C0627B Position P1-F3 Instrument Name Instrument 1  
 Inj Vol -1 InjPosition Sample User Name IRN Calibration Status Success  
 Data Filename C0627B.d ACQ Method 0103.m Comment Acquired Time 10/26/2016 6:43:17 PM

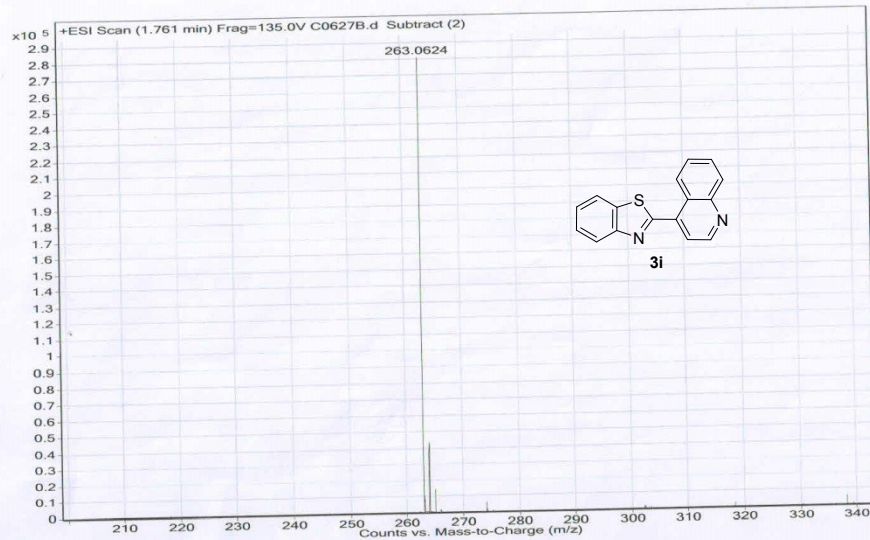

AV300 1H 20161101 CXL C0627B

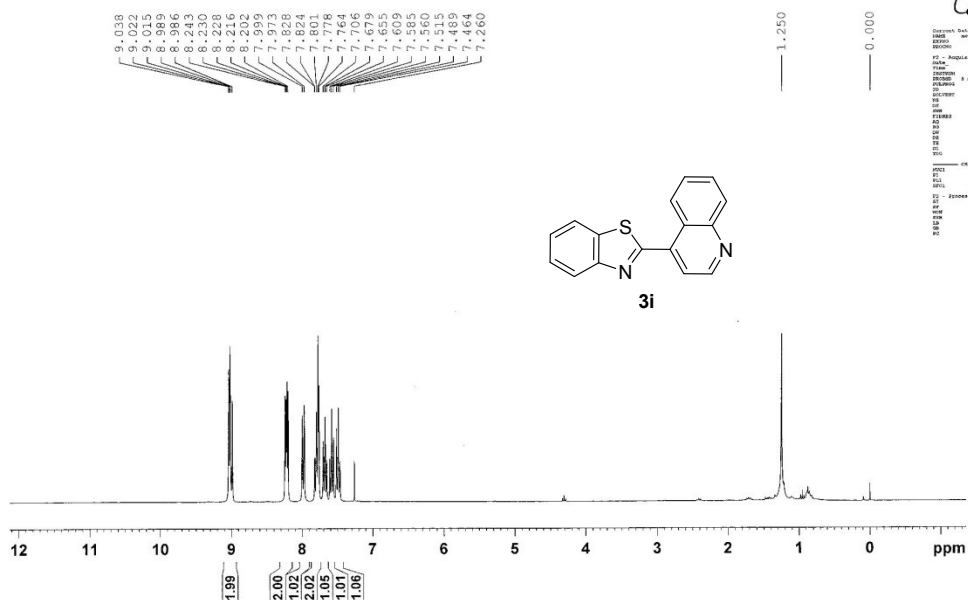

**BRUKER**

Current Data Parameters  
 NAME av300-1h-20161101-01  
 EXPNO 1  
 F2 - Acquisition Parameters  
 Date\_ 20161101  
 Time 12:25  
 INSTRUM spect  
 PROCESSED 1 sec HSI00000000  
 FIDRES 0.0004  
 AQ 0.0004  
 RG 65536  
 DATAFILE av300-1h-20161101-01  
 F2 - Processing parameters  
 SI 32768  
 SF 400.1464000  
 DS 4  
 SWH 10.6350000  
 FWHM 0.1800000  
 AQ 0.0004000  
 SFO 400.1464000  
 EQ 1.0000000  
 ZF 0.0000000  
 PC 1.0000000  
 GC 0.0000000  
 DC 0.0000000  
 SC 0.0000000  
 SB 0.0000000  
 SD 0.0000000  
 SE 0.0000000  
 SF 0.0000000  
 SI 0.0000000  
 SO 0.0000000  
 SW 0.0000000  
 SZ 0.0000000  
 TB 0.0000000  
 TC 0.0000000  
 TD 0.0000000  
 TE 0.0000000  
 TF 0.0000000  
 TG 0.0000000  
 TH 0.0000000  
 TI 0.0000000  
 TJ 0.0000000  
 TK 0.0000000  
 TL 0.0000000  
 TM 0.0000000  
 TN 0.0000000  
 TO 0.0000000  
 TP 0.0000000  
 TQ 0.0000000  
 TR 0.0000000  
 TS 0.0000000  
 TT 0.0000000  
 TV 0.0000000  
 TW 0.0000000  
 TX 0.0000000  
 TY 0.0000000  
 TZ 0.0000000

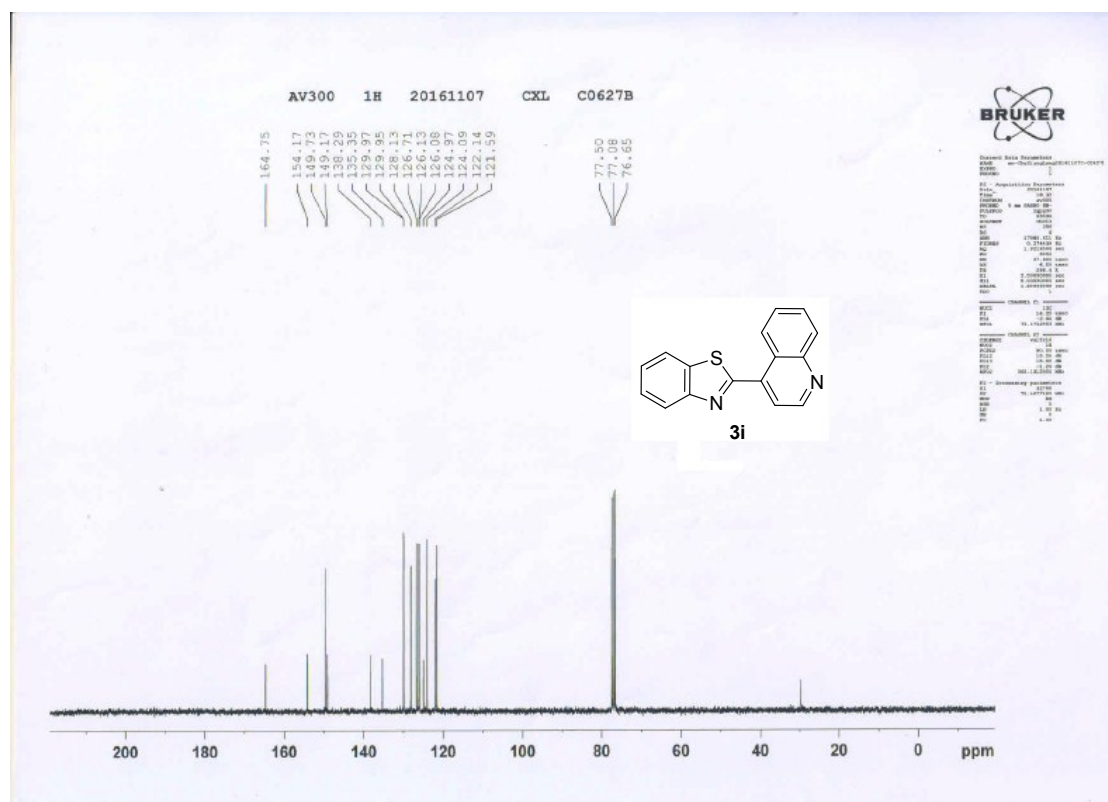

+ESI Scan (1.954 min) Frag=135.0V C0705.d Subtract (21)

x10<sup>4</sup>  
 2.4  
 2.3  
 2.2  
 2.1  
 2  
 1.9  
 1.8  
 1.7  
 1.6  
 1.5  
 1.4  
 1.3  
 1.2  
 1.1  
 1  
 0.9  
 0.8  
 0.7  
 0.6  
 0.5  
 0.4  
 0.3  
 0.2  
 0.1  
 0

313.0792

3j

Counts vs. Mass-to-Charge (m/z)

50 75 100 125 150 175 200 225 250 275 300 325 350 375 400 425 450 475 500 525 550

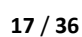

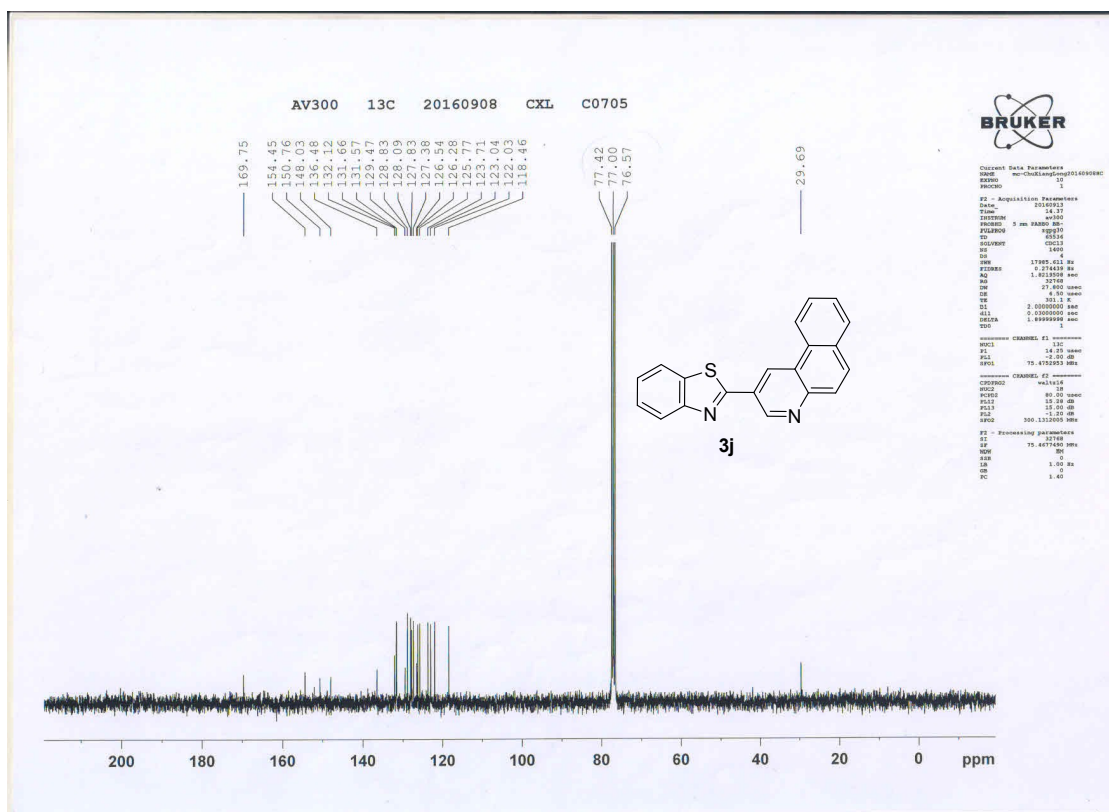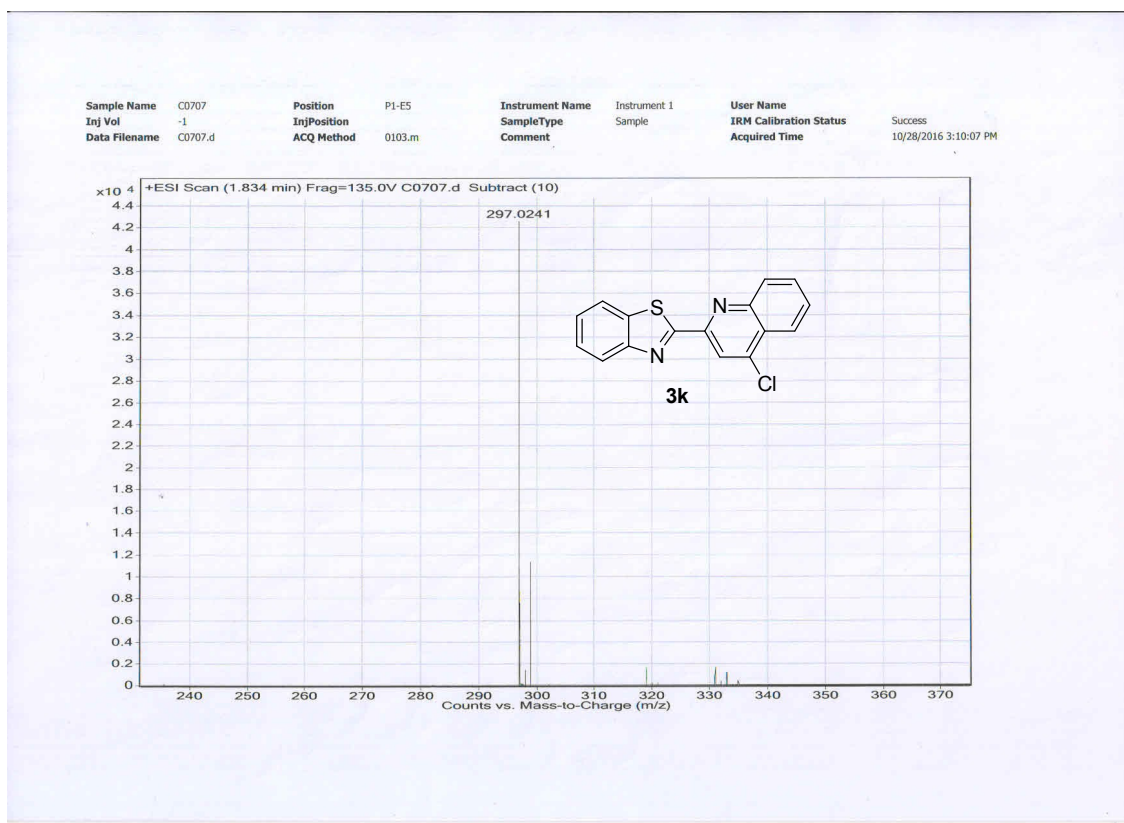



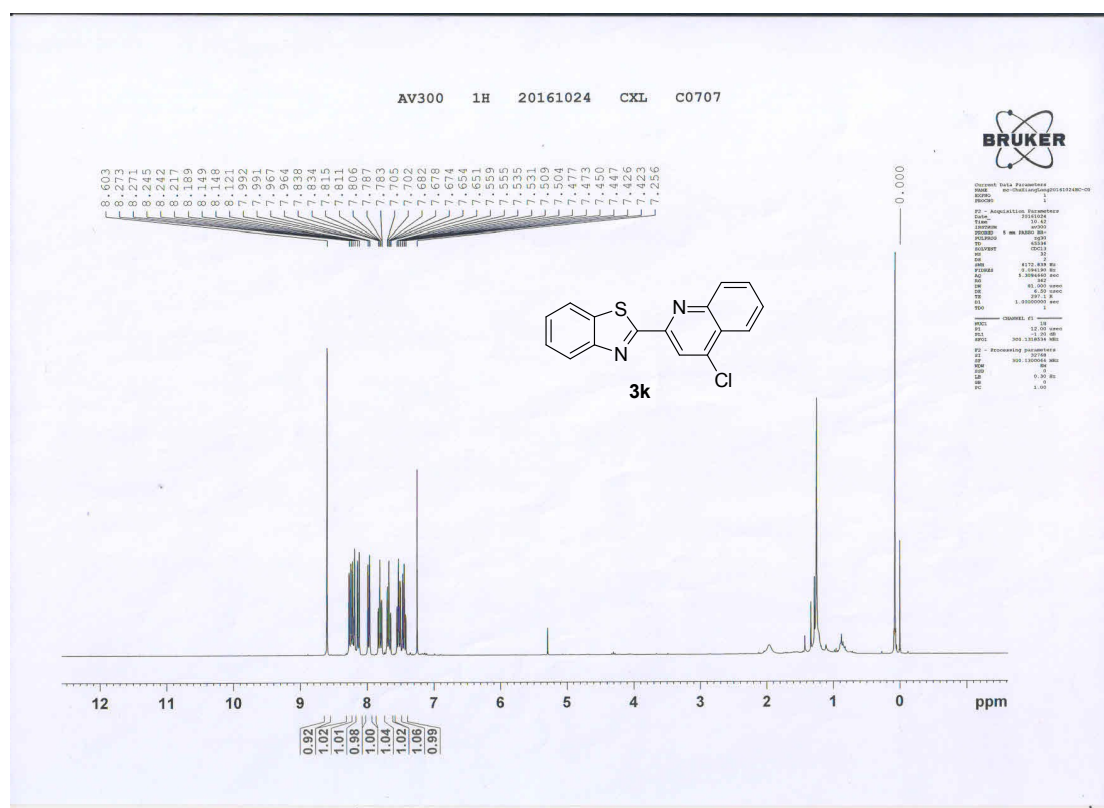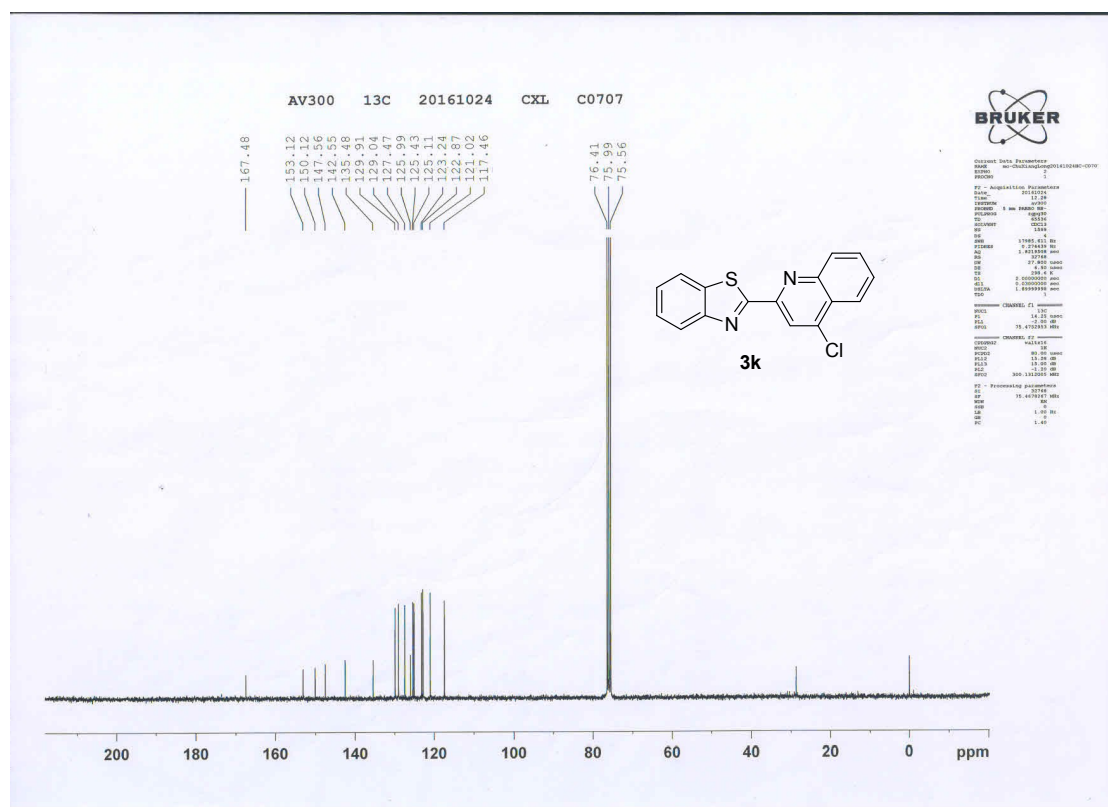

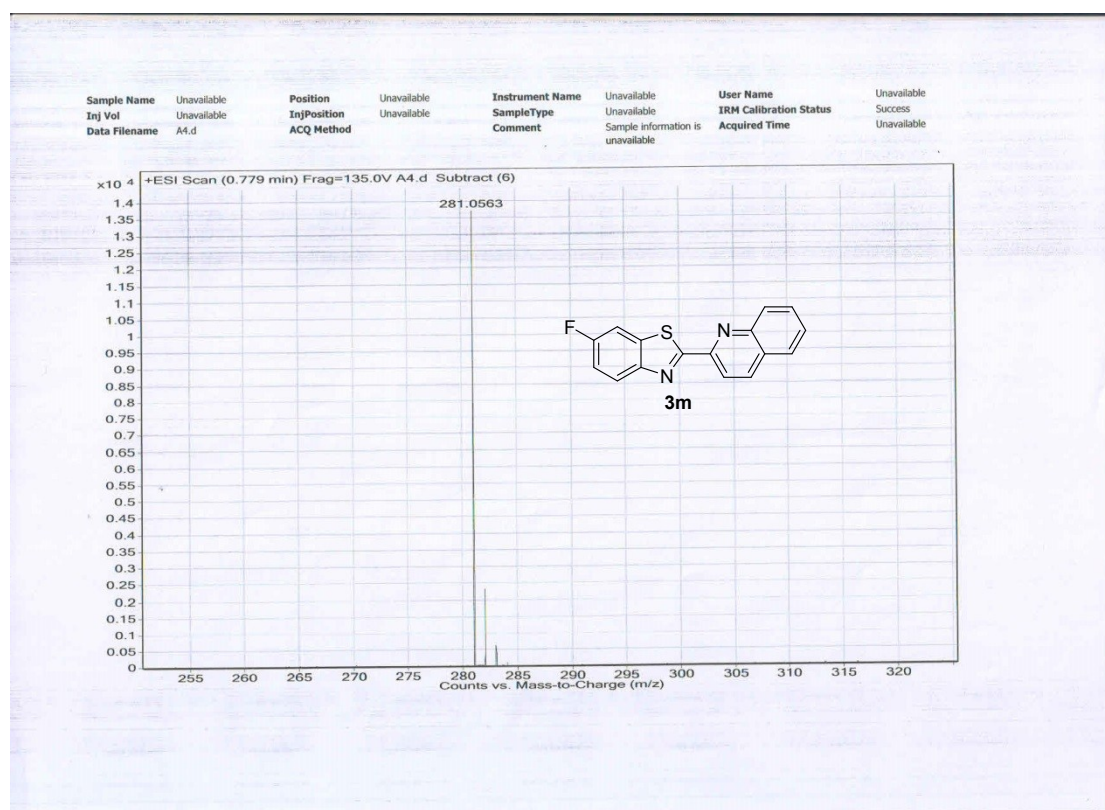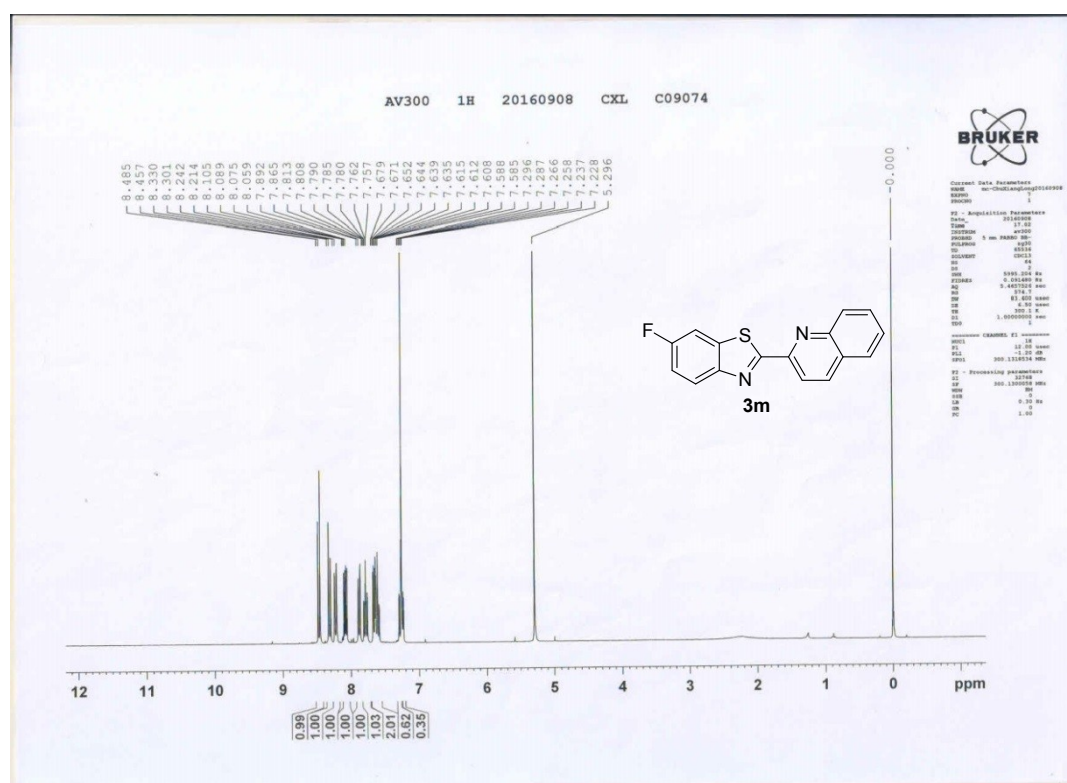



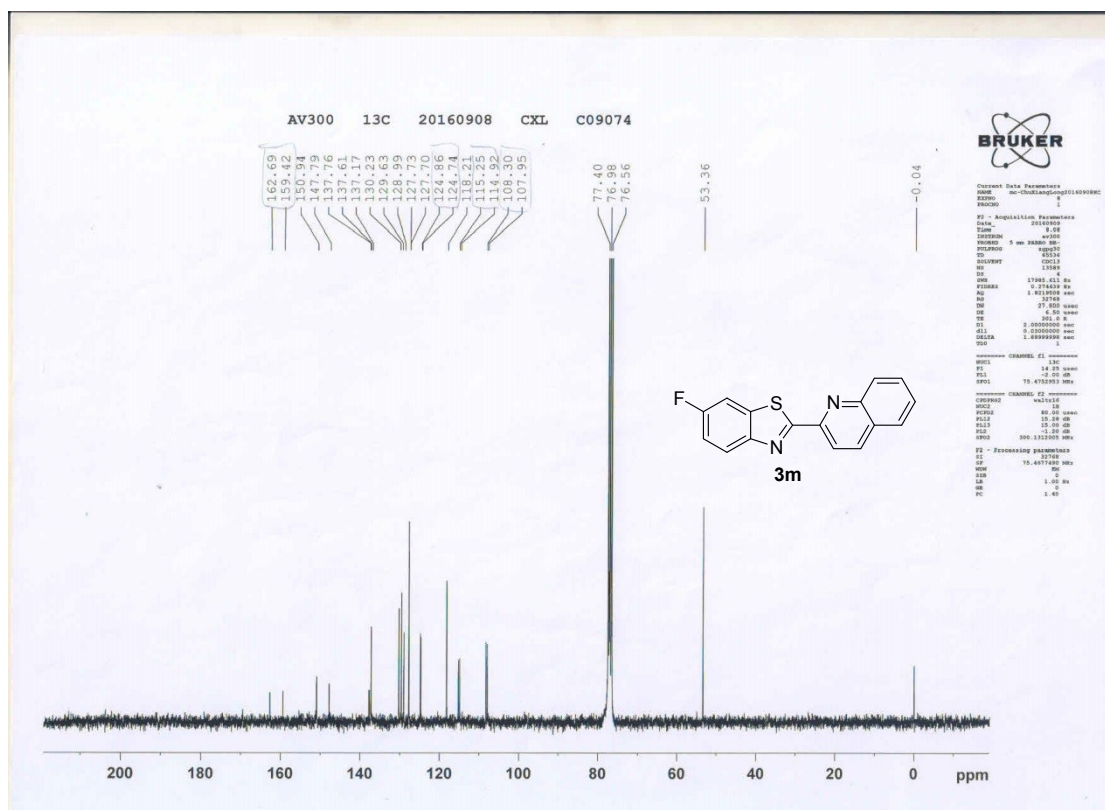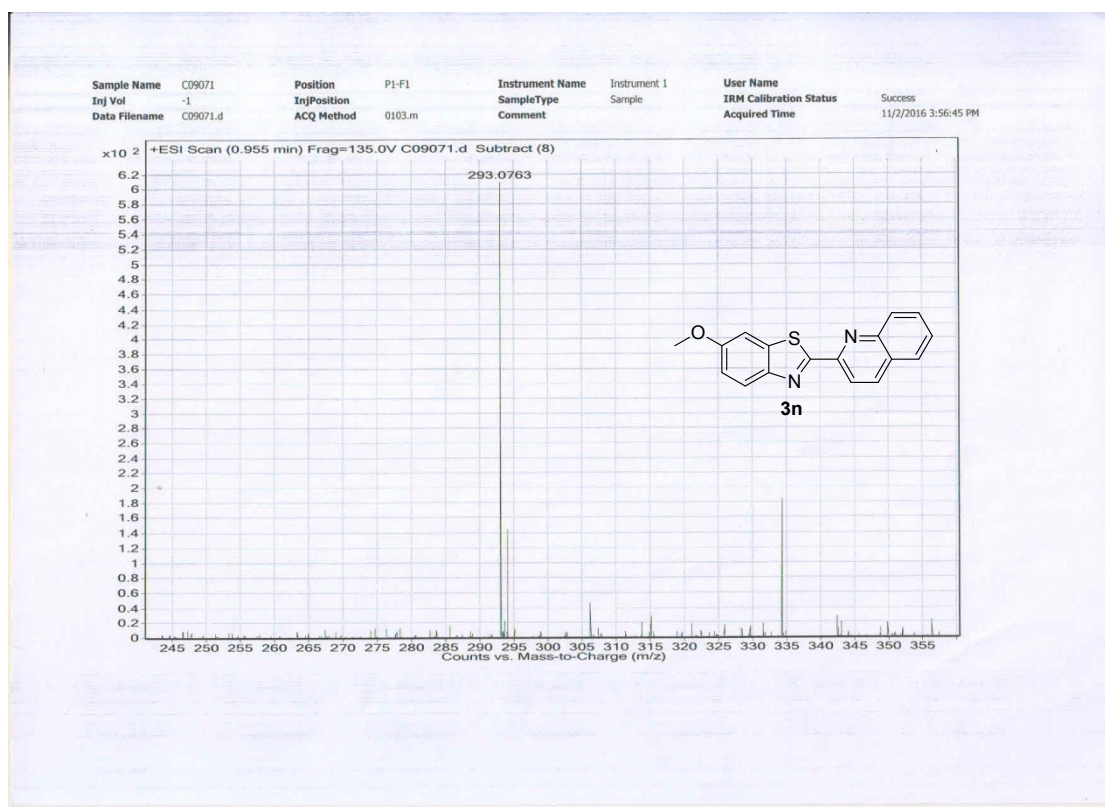

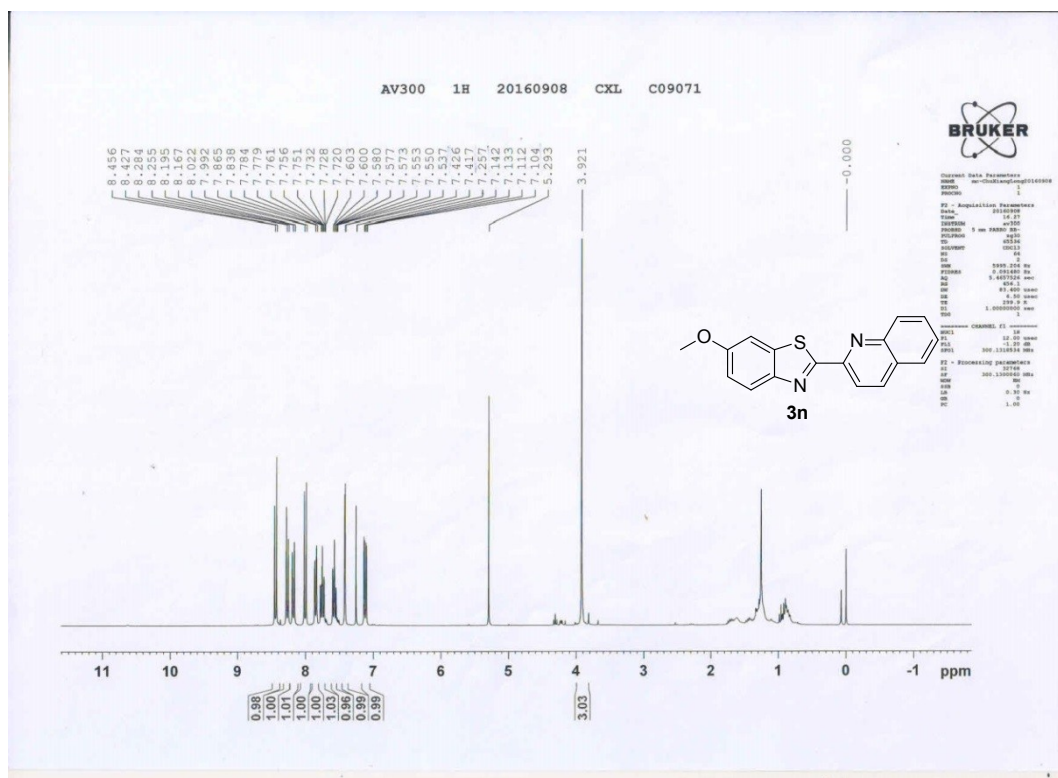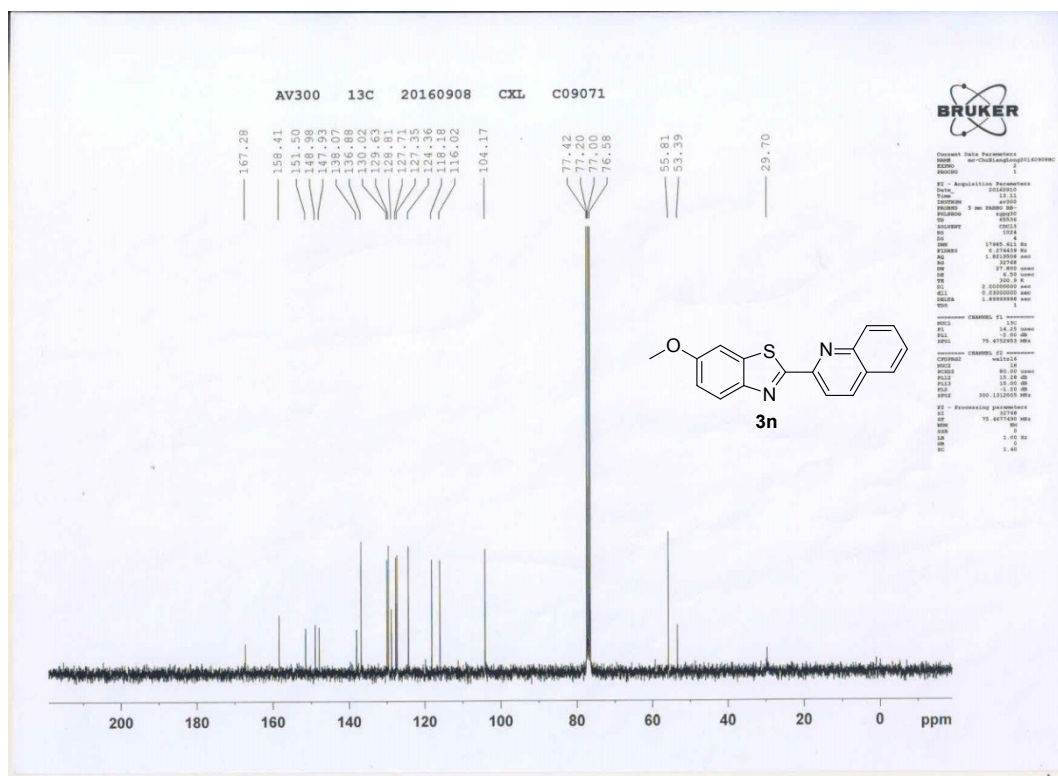

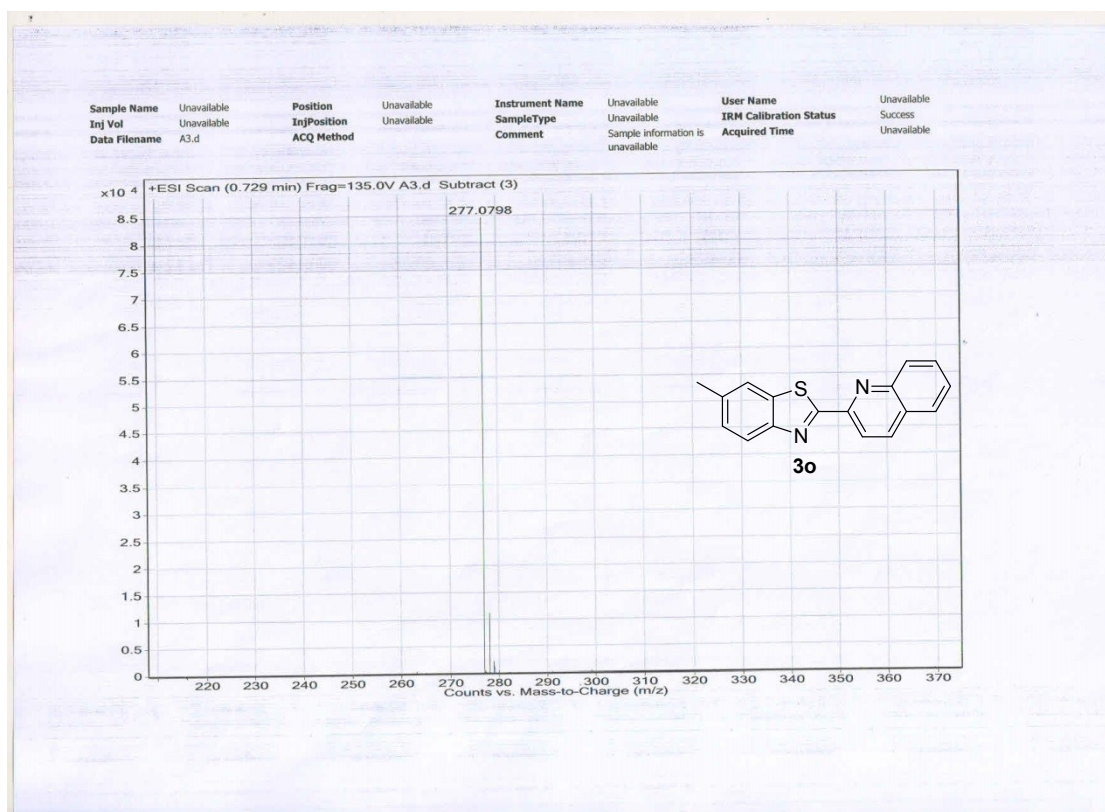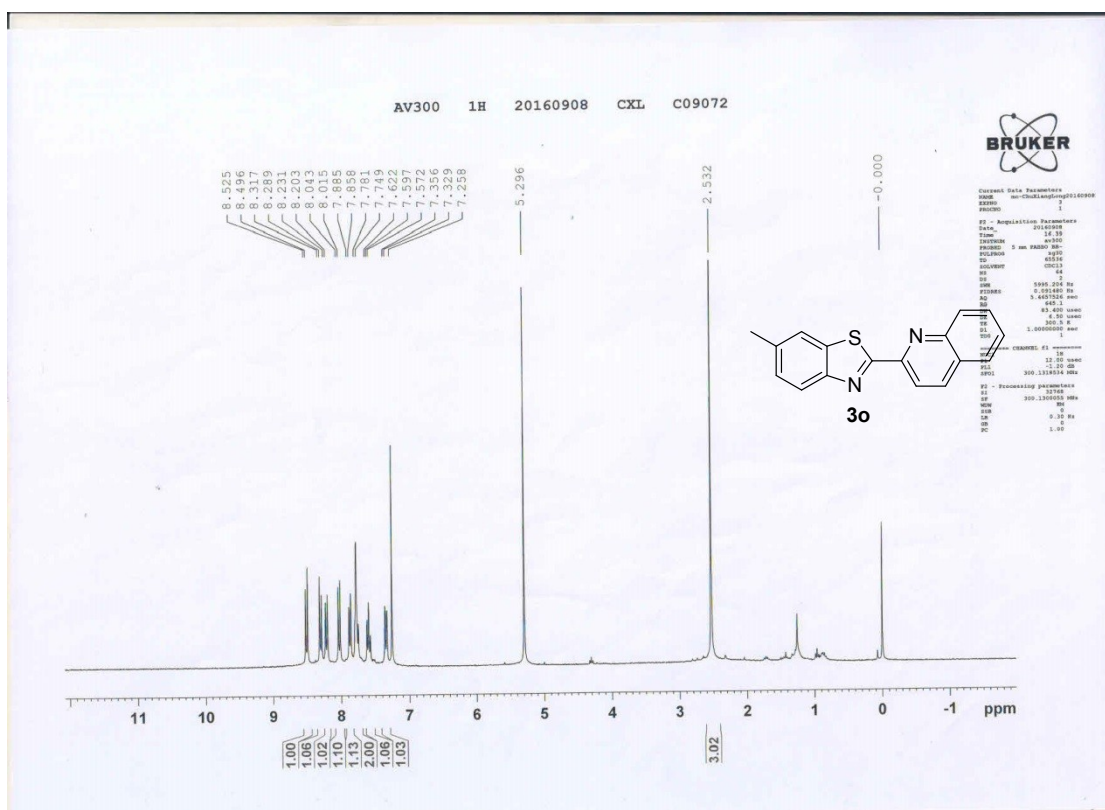



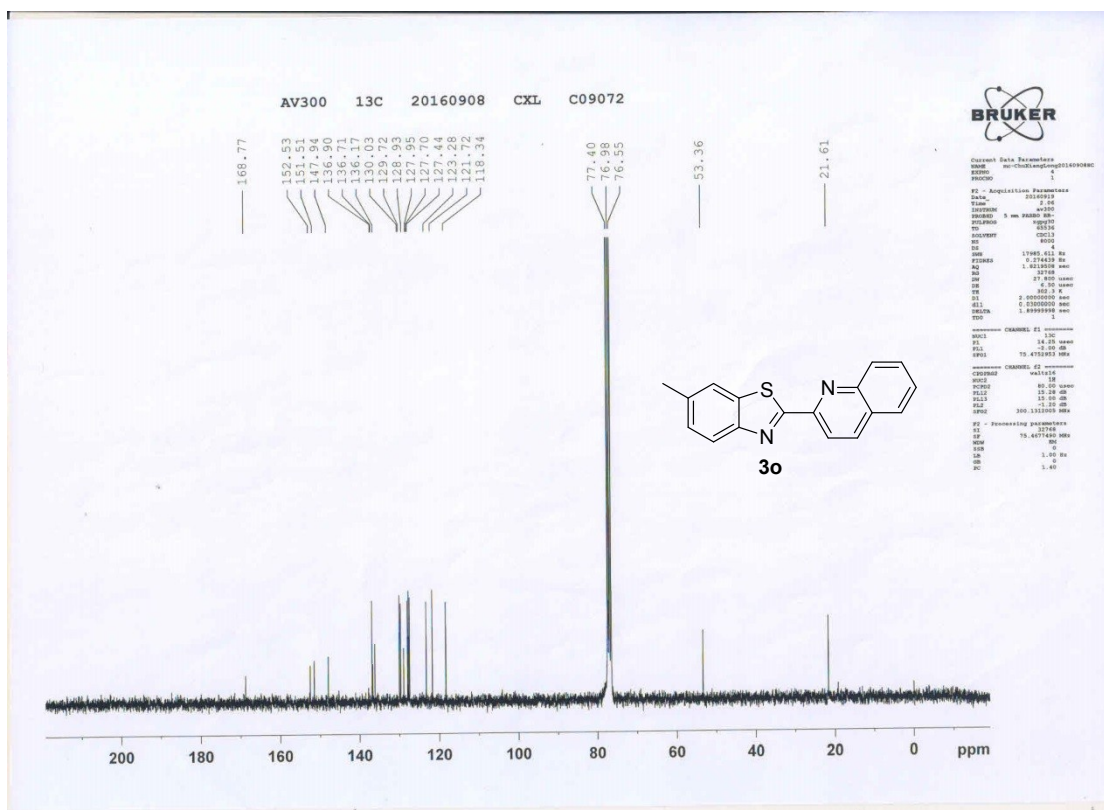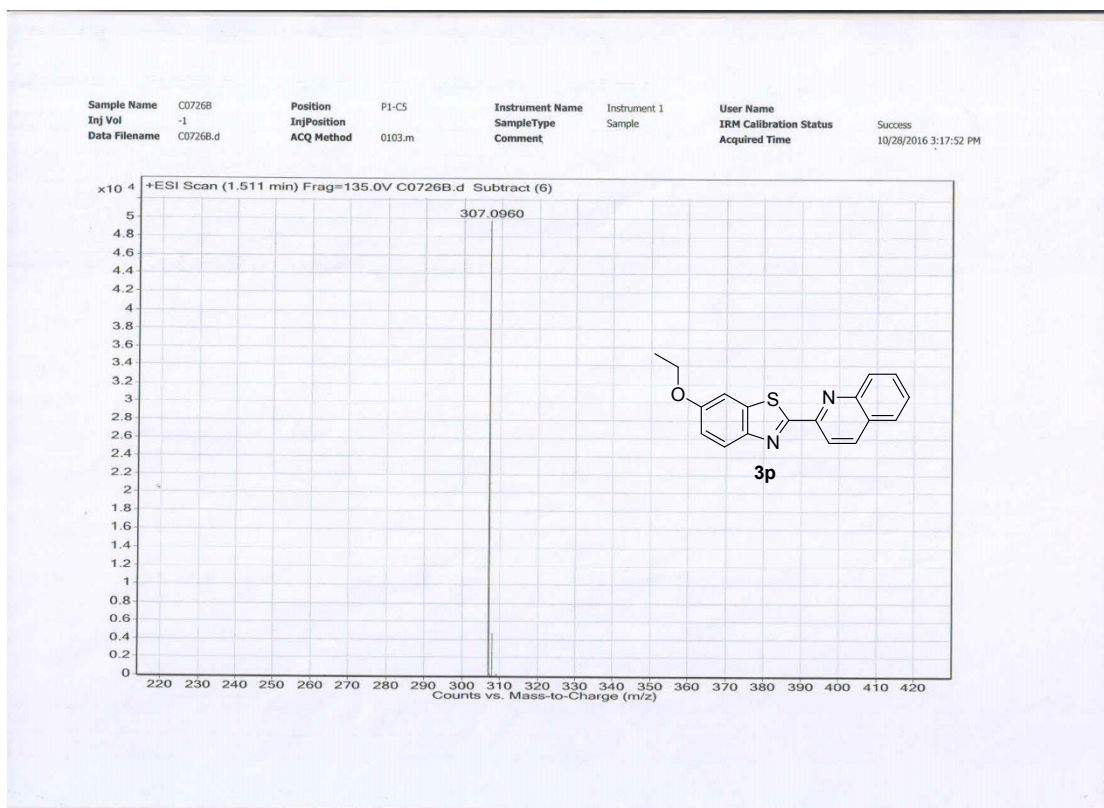

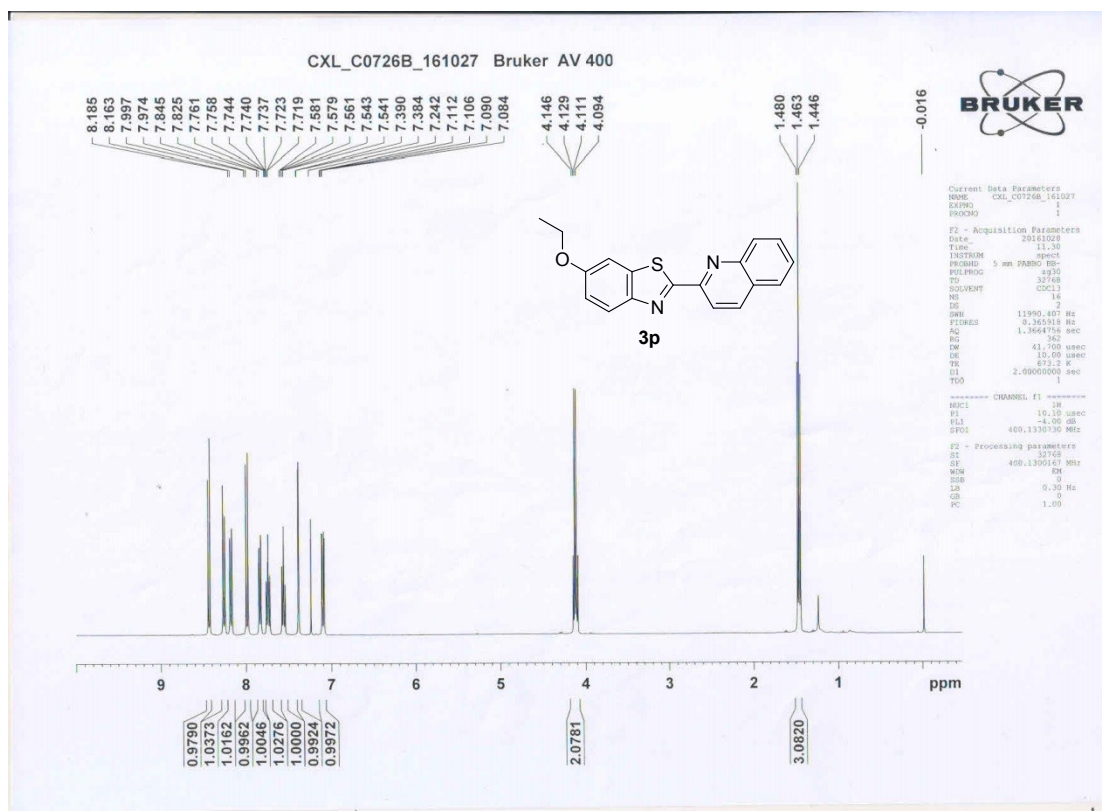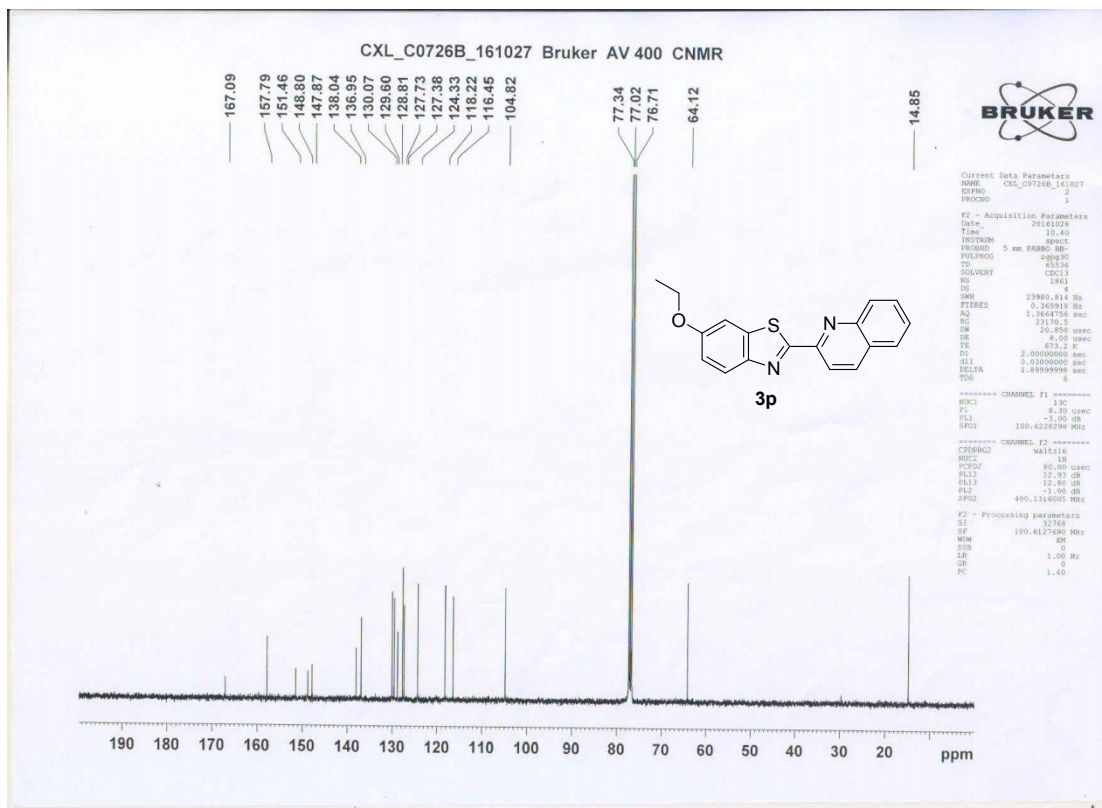

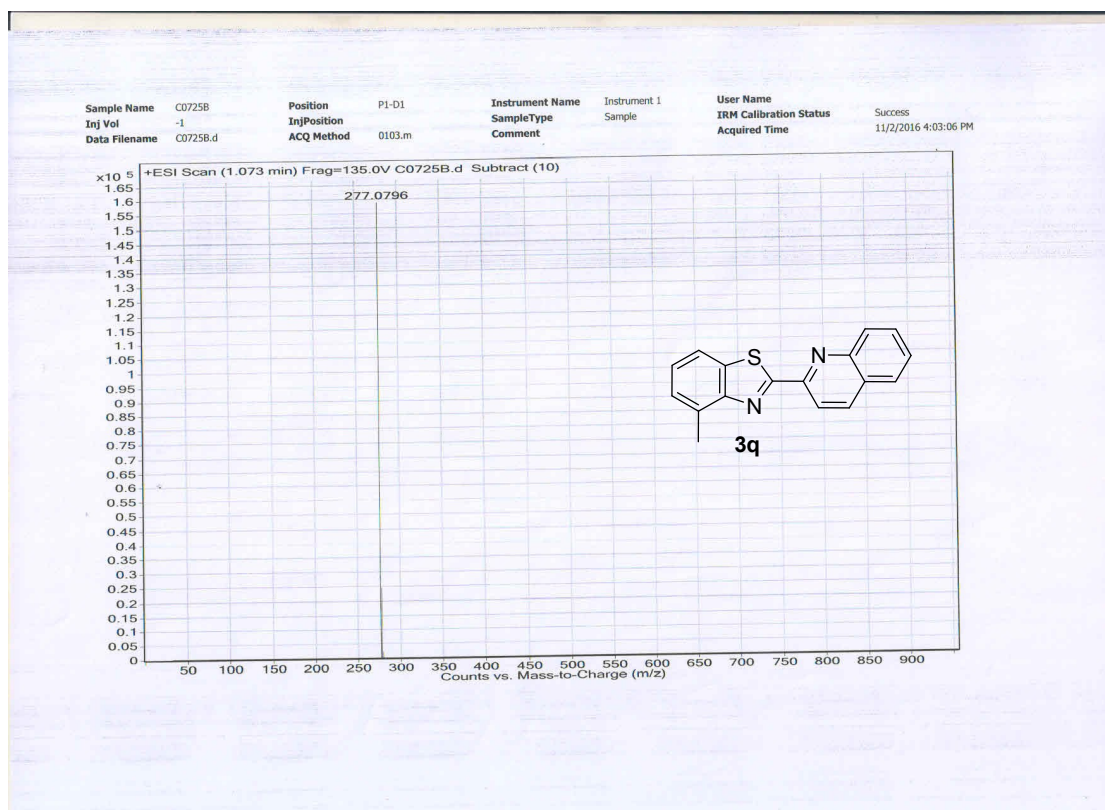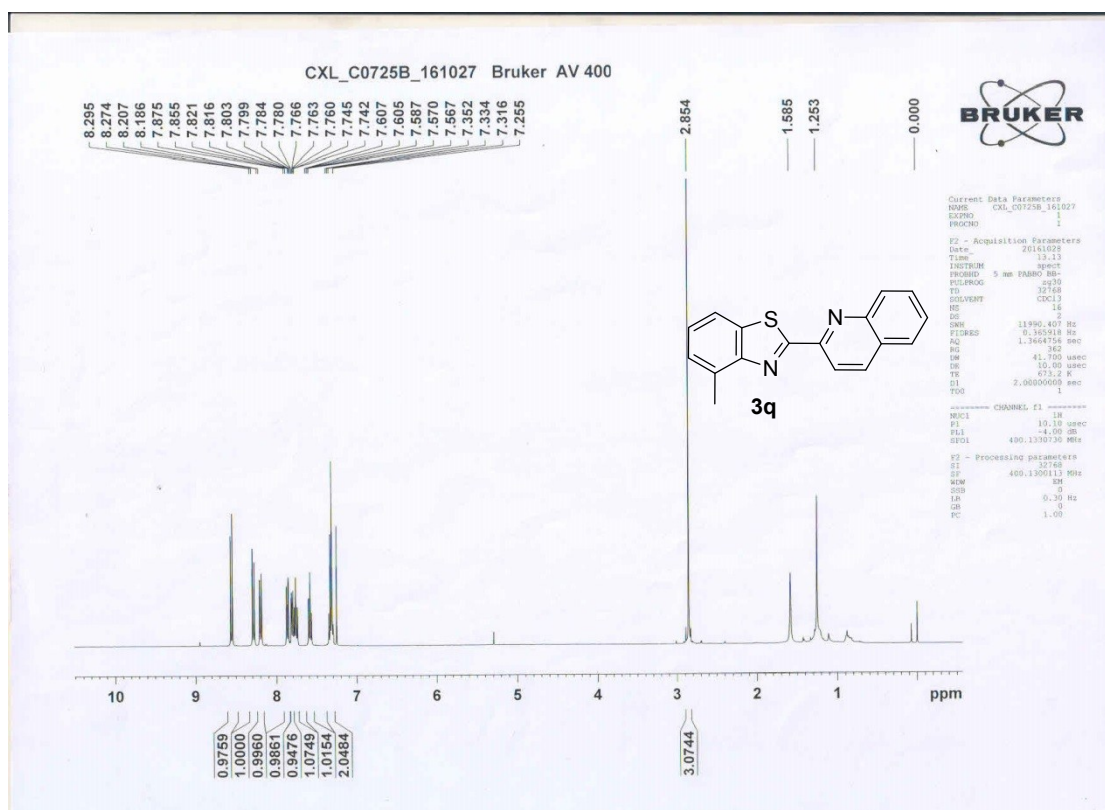



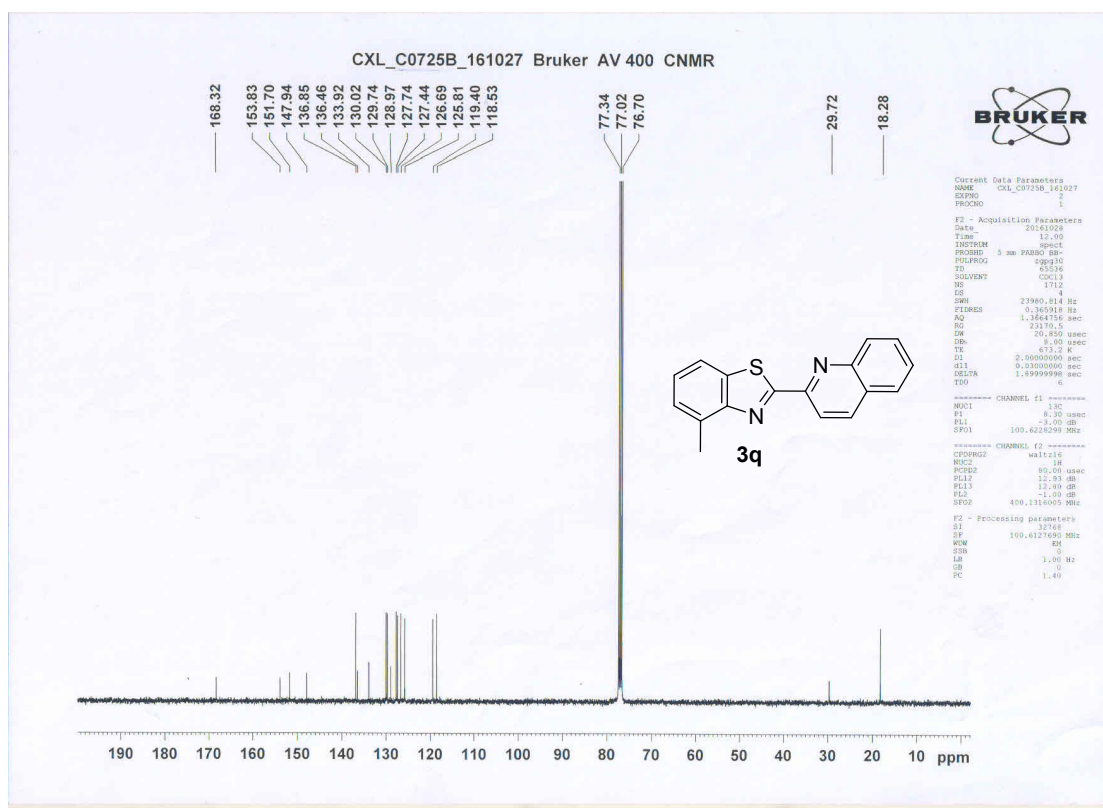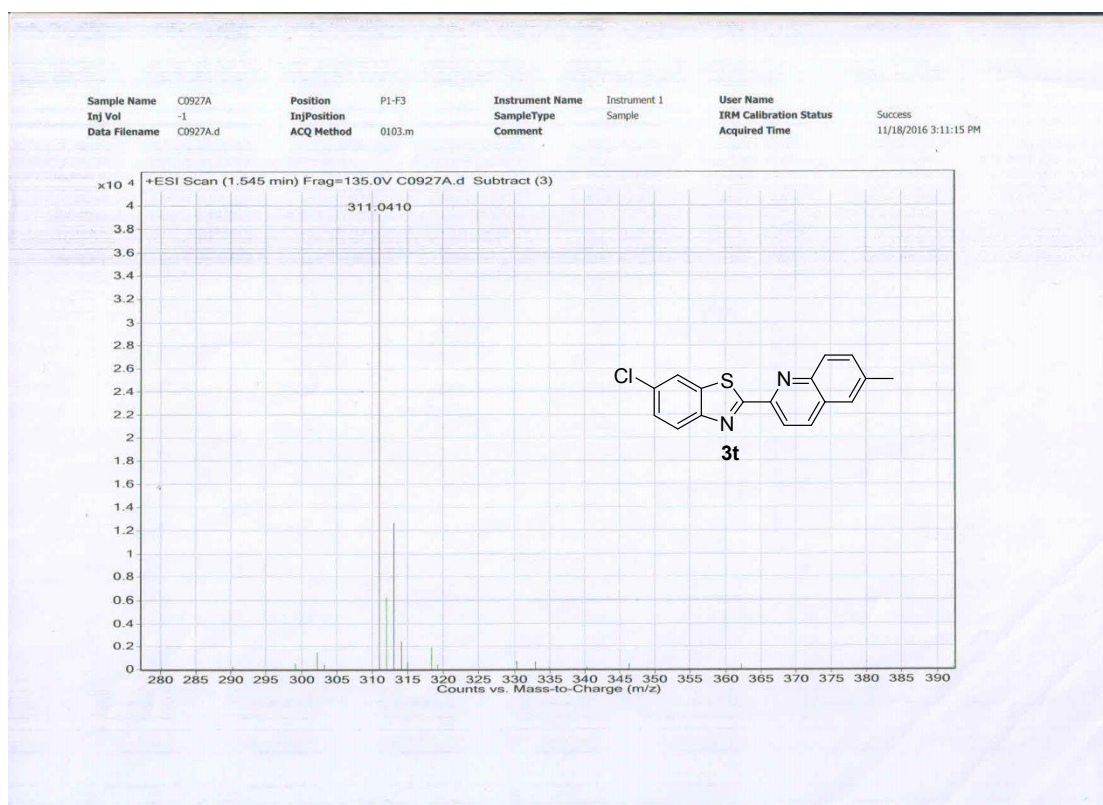

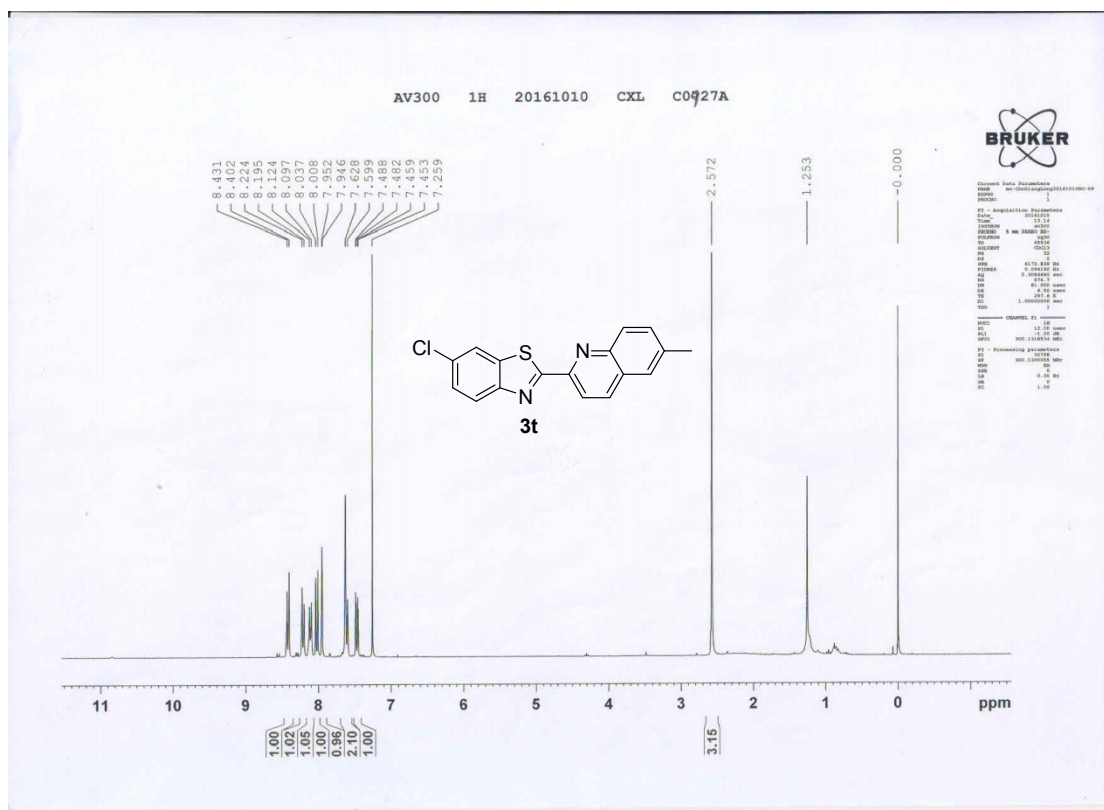

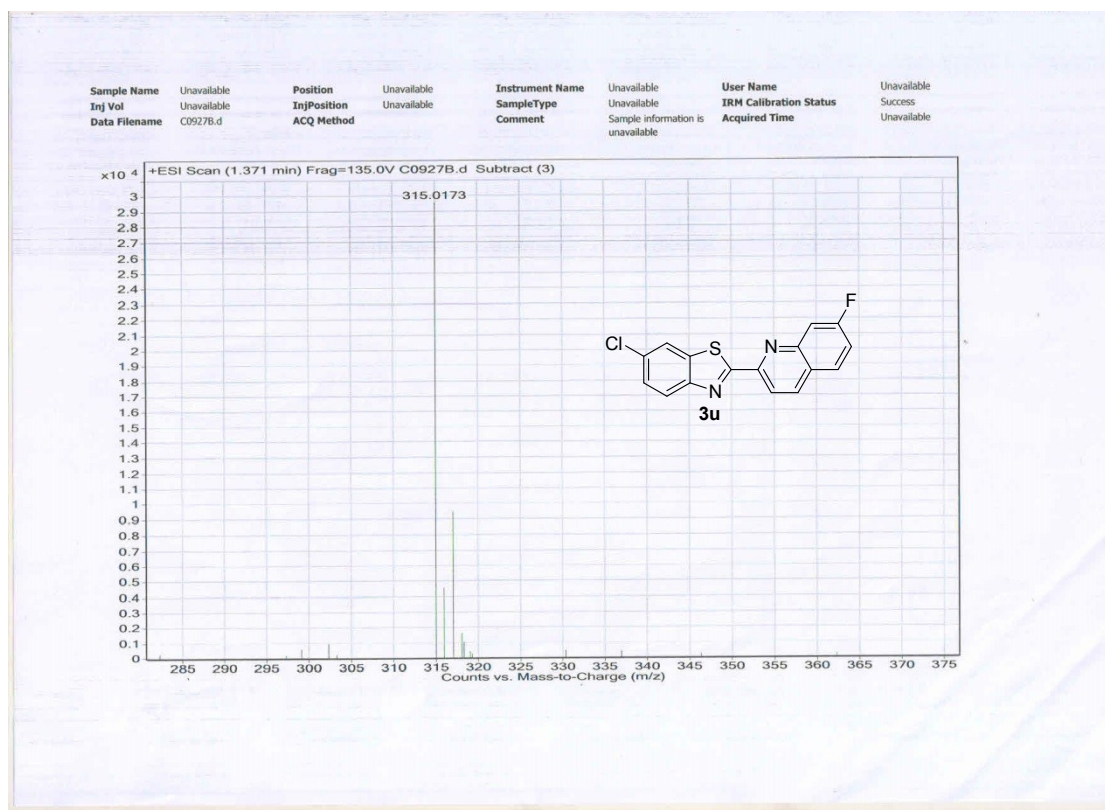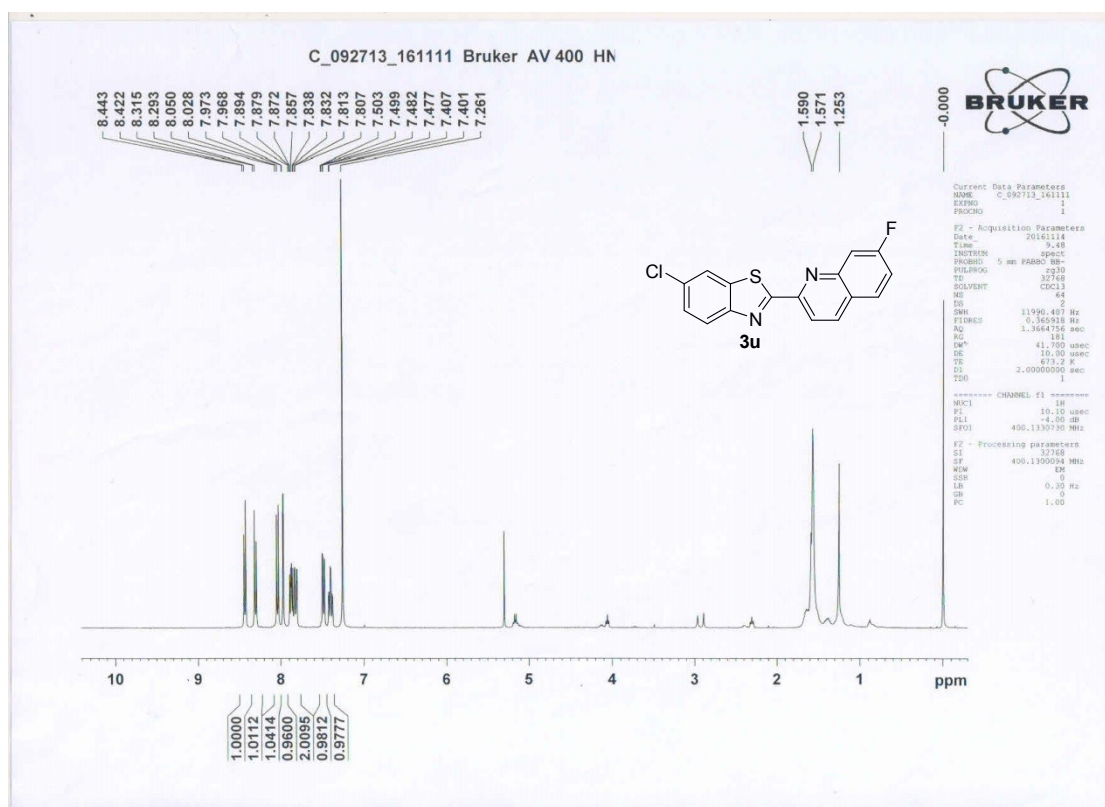



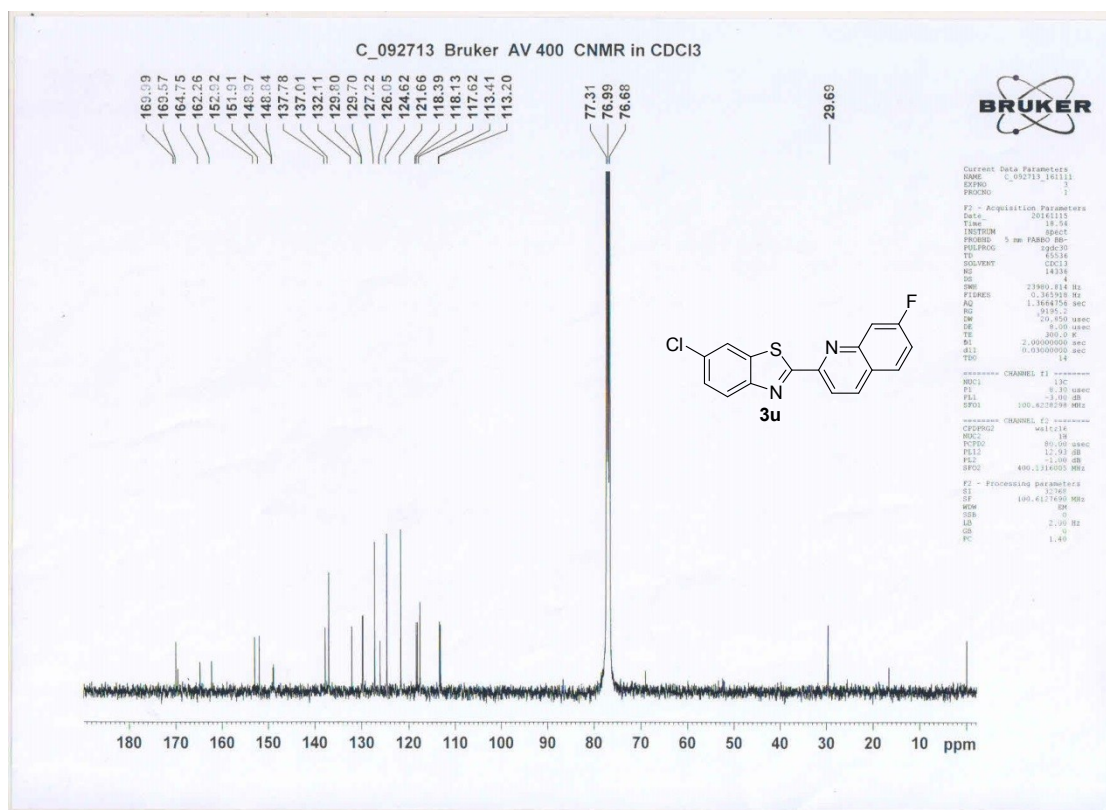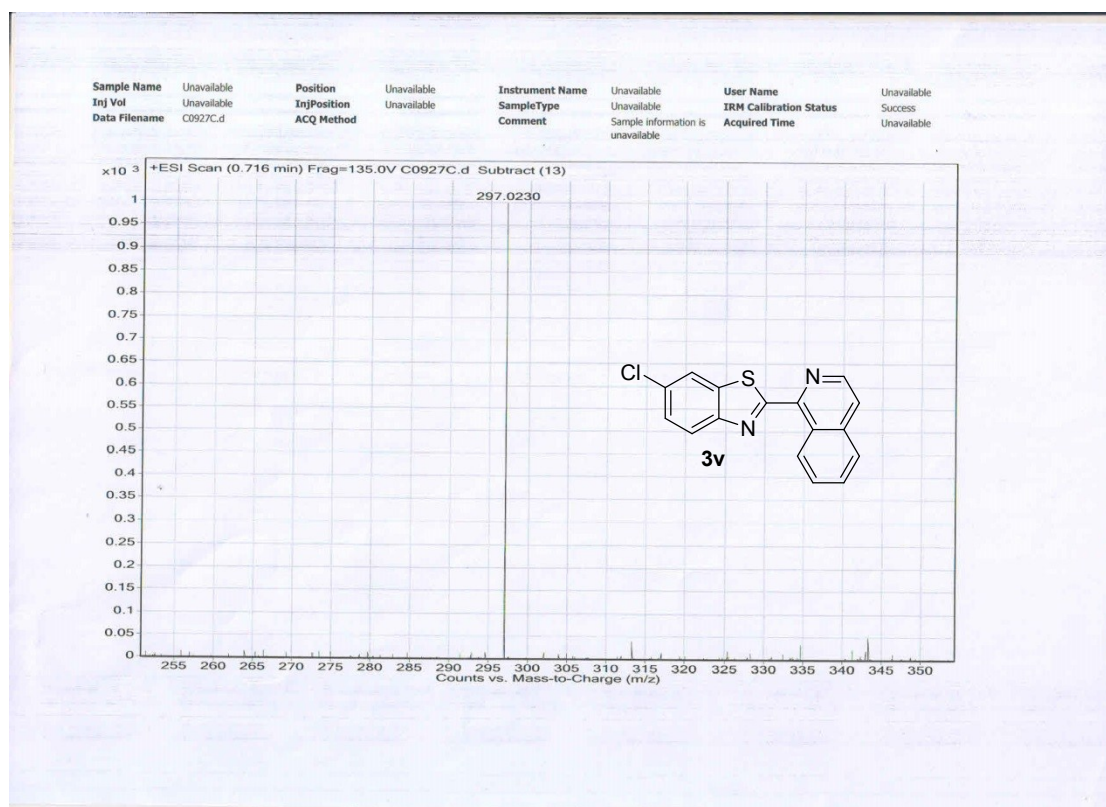

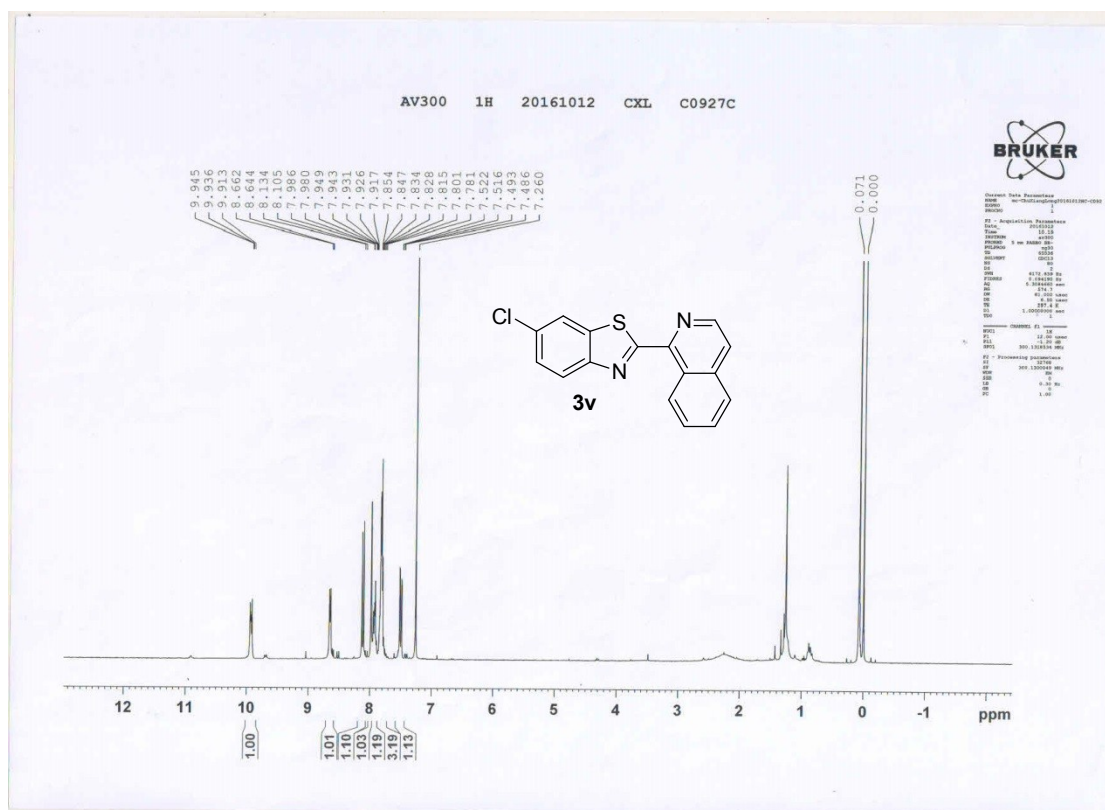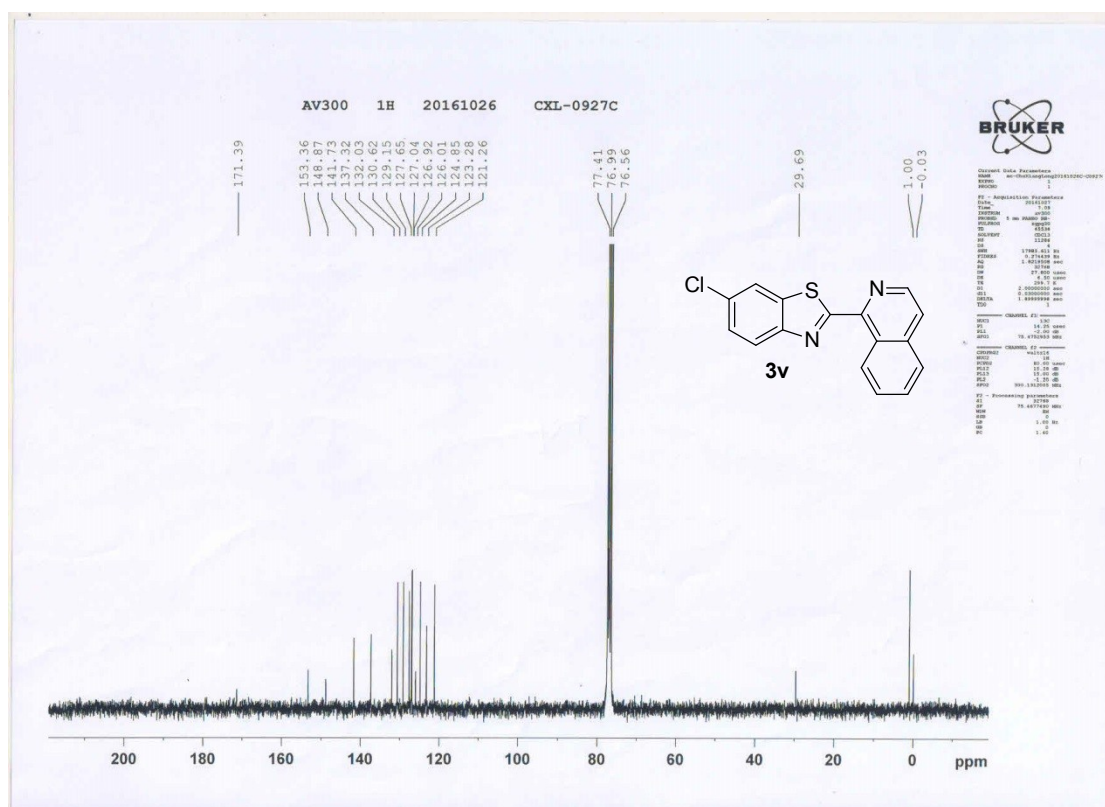



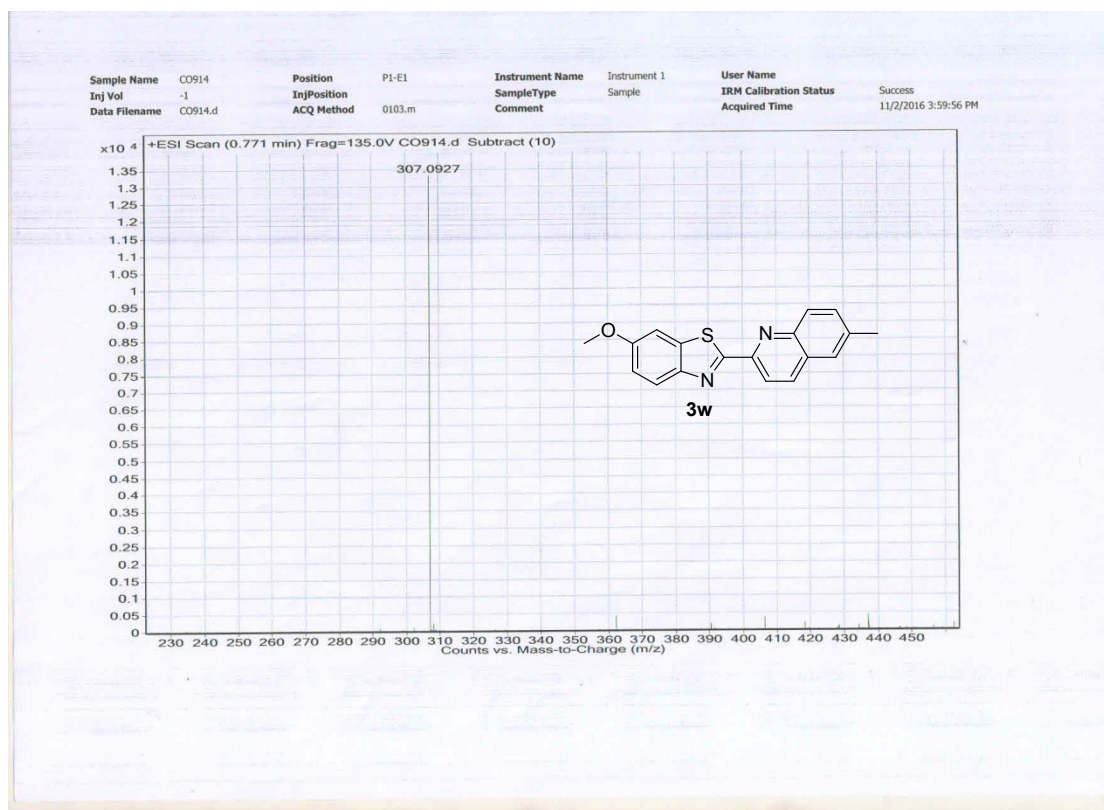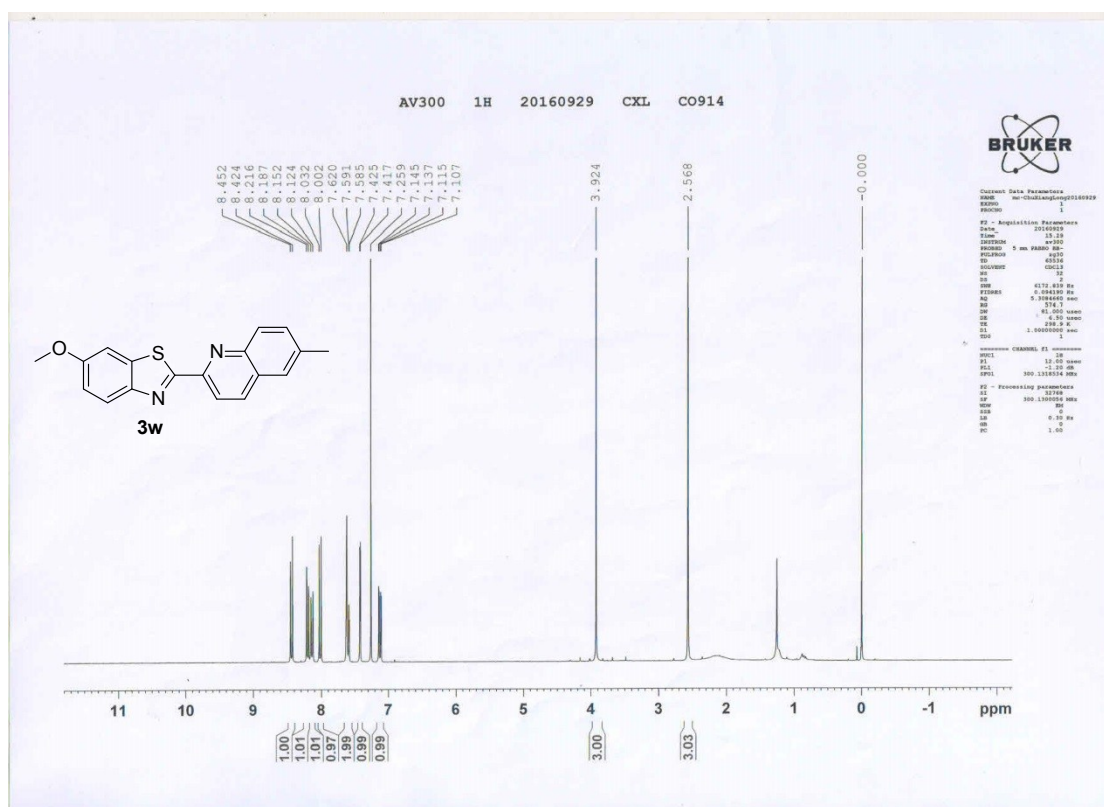



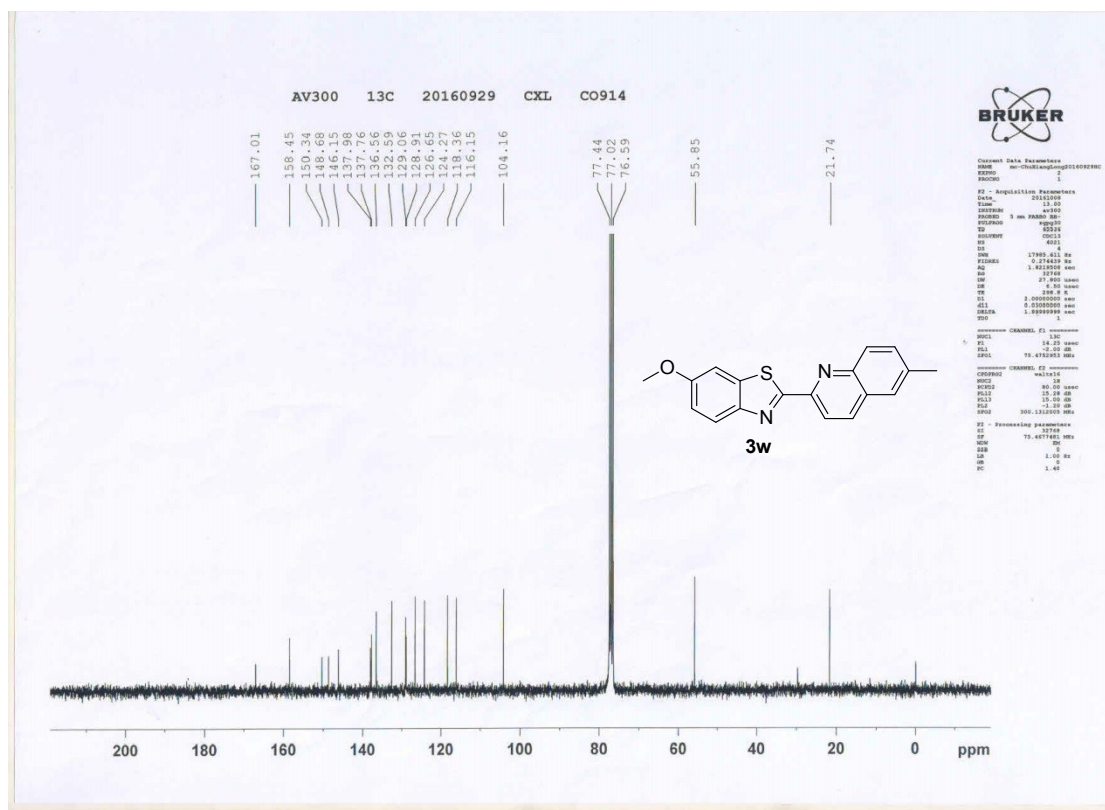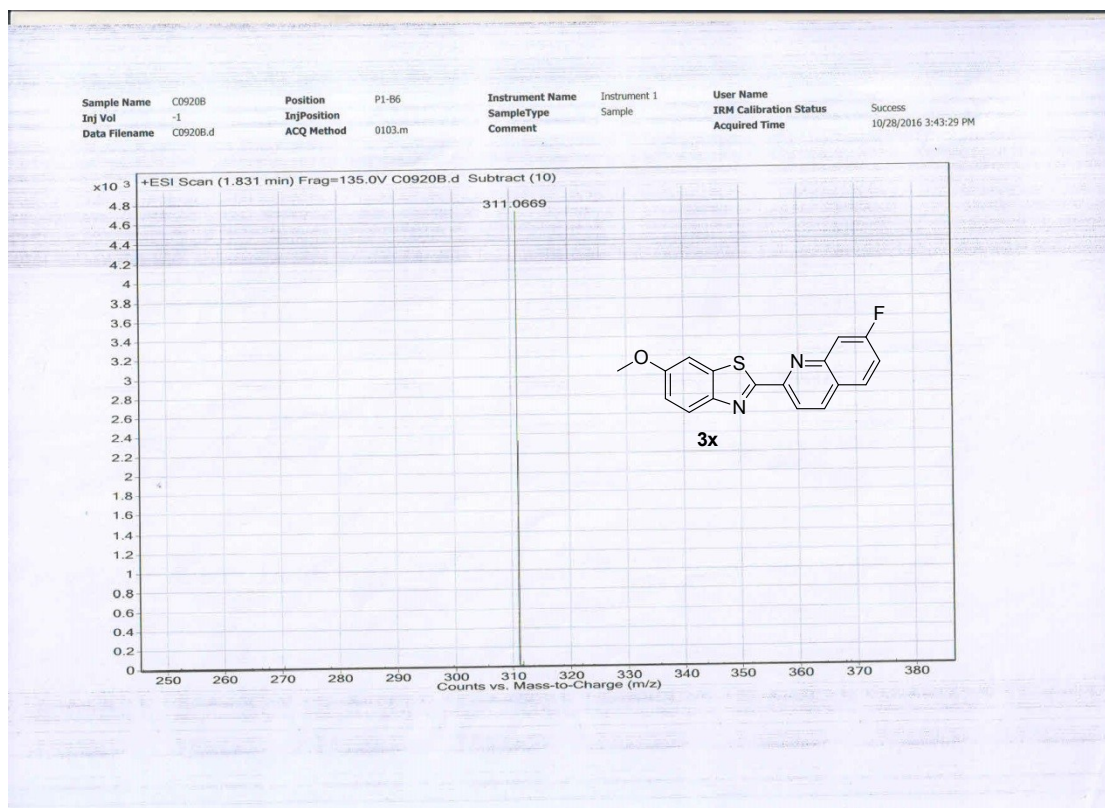

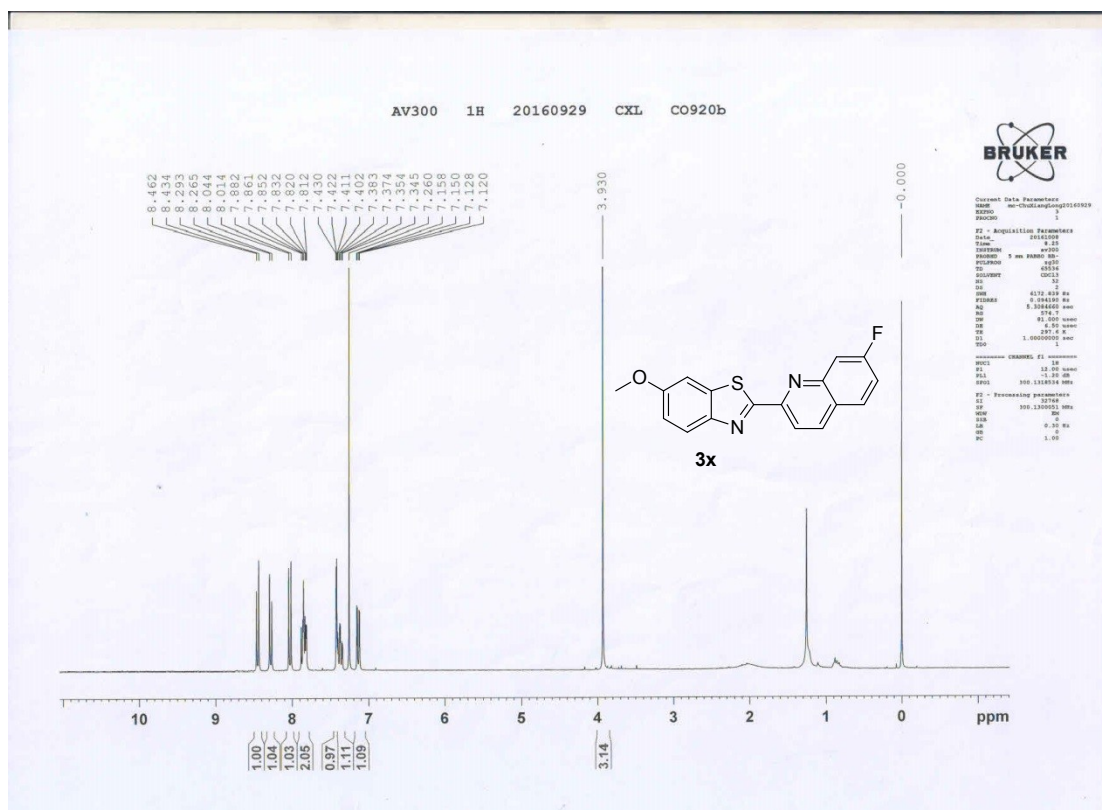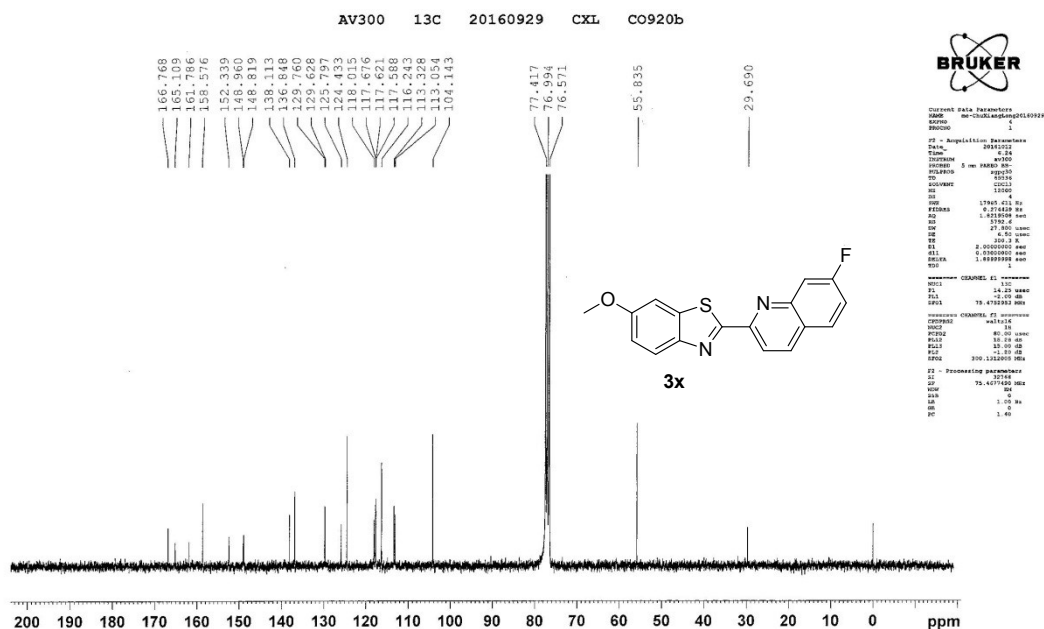

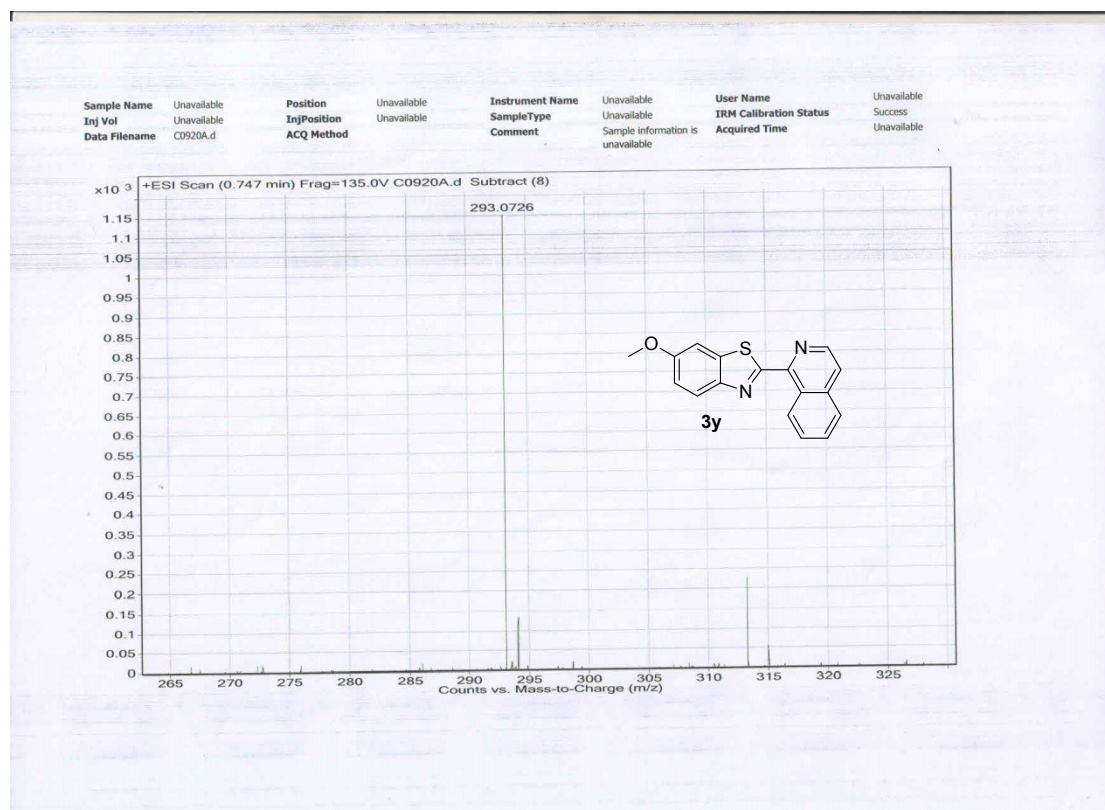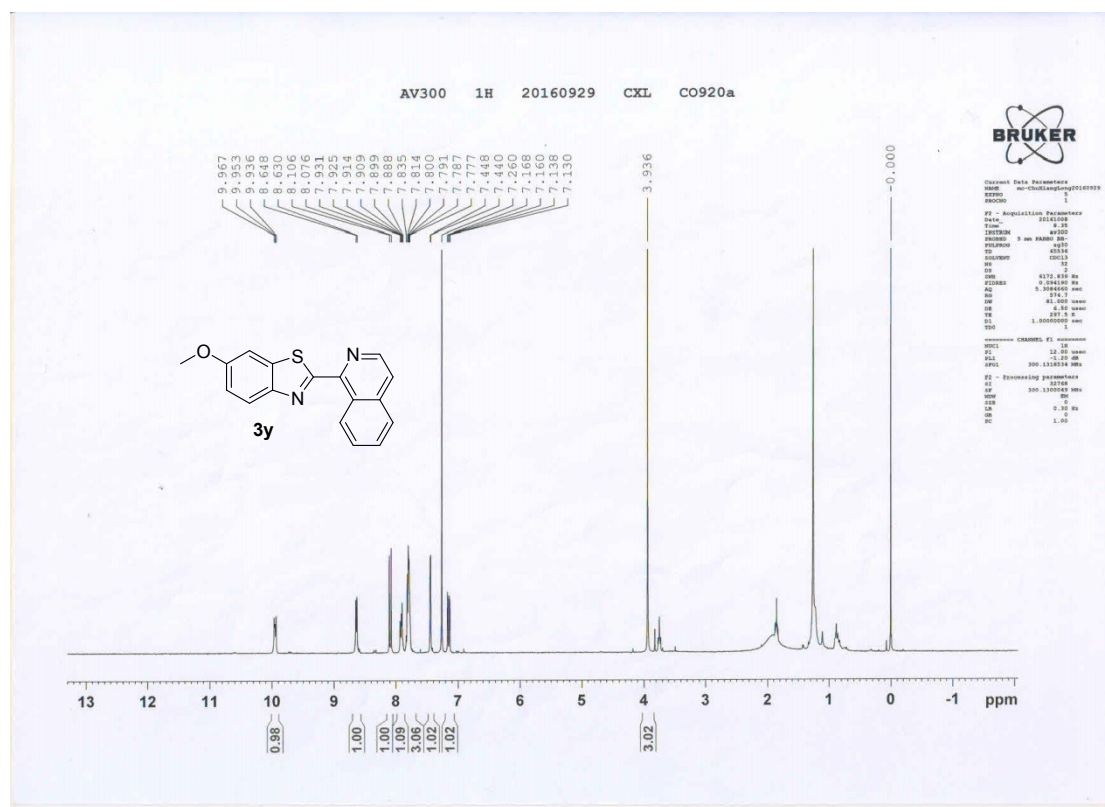

Supplement: c6ob02731h1.pdf [file c6ob02731h1.pdf]
